# Supplementary material for: Long-term human impact and environmental change in mid-western Ireland, with particular reference to Céide Fields – an overview
Source: Copernicus journal article supplement (doi:10.5194/egqsj-69-1-2020), 2020-02-11

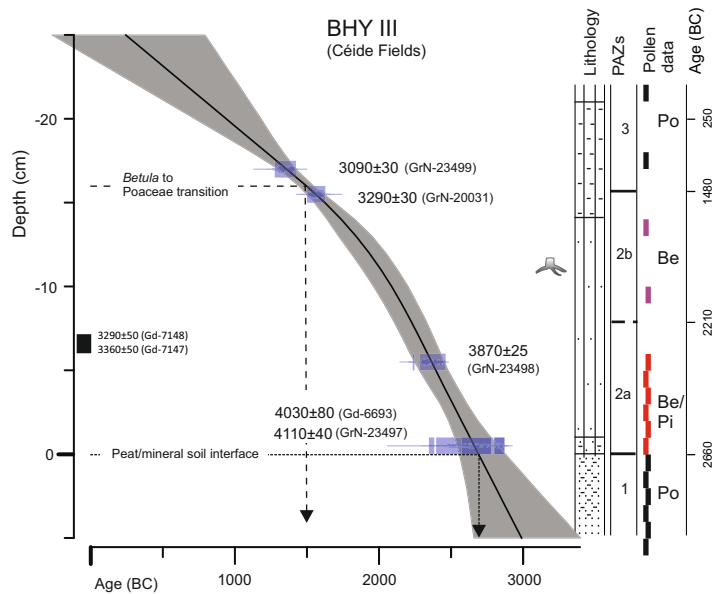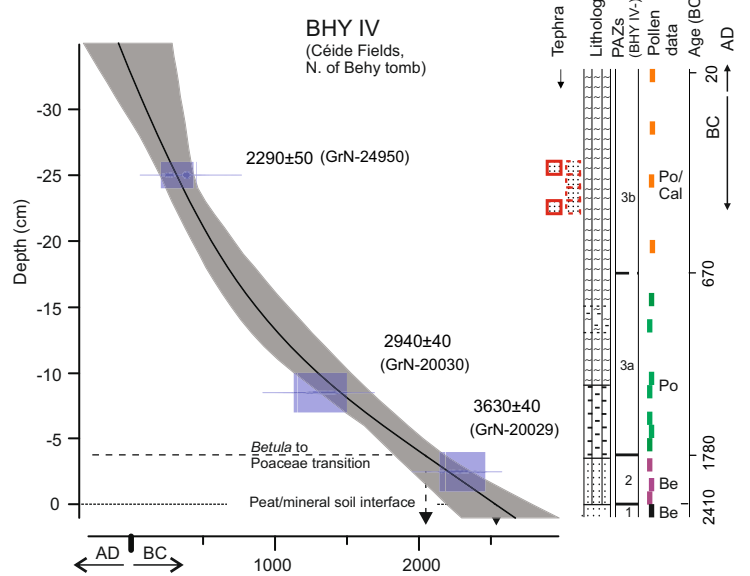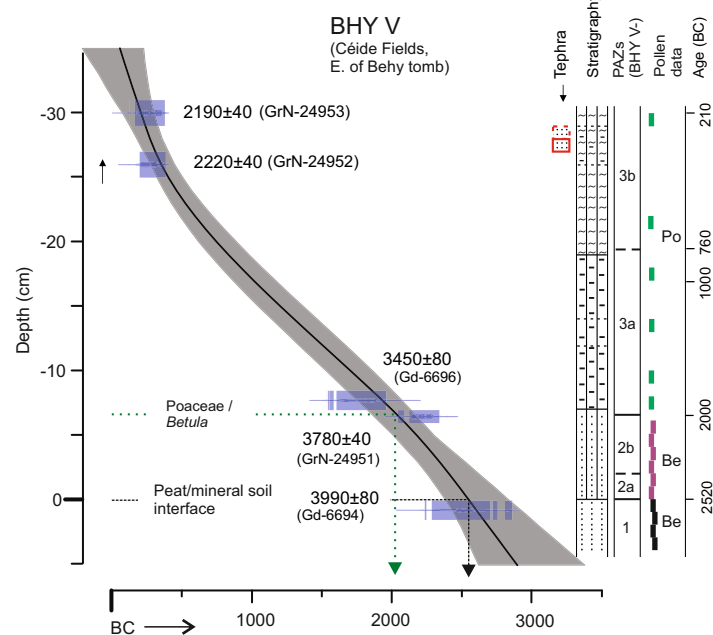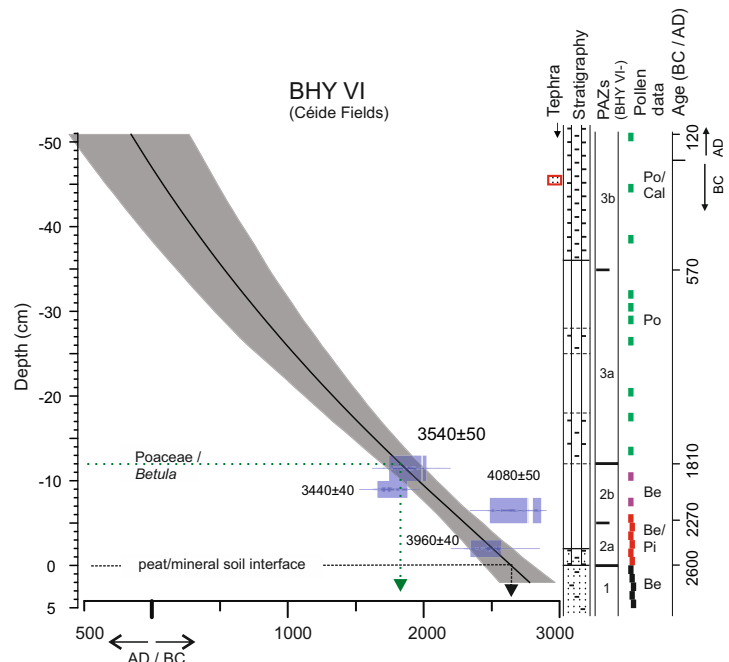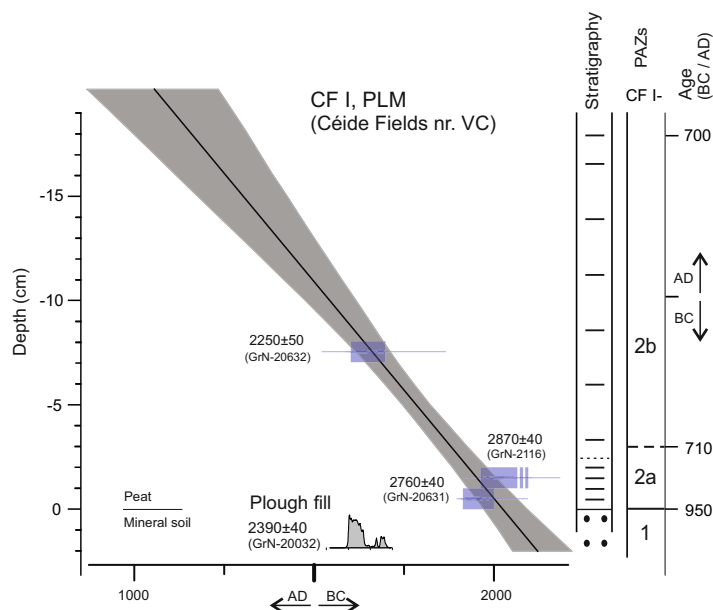

**Figure S2a.** Age/depth relationships, generated by CLAM, for short profiles from Céide Fields. Information shown in the figures include:  $^{14}\text{C}$  dates used by CLAM, lithology, PAZs, and pollen data, i.e. position within the profile of the pollen spectra which are colour coded to indicate the dominant pollen taxa (Be: *Betula*; Pi: *Pinus*; Po: *Poaceae*; Cal: *Calluna*) and PAZ boundary ages (derived from age/depth model). Tephra layers are indicated (extracted by ashing and geochemically; the latter bounded by non-broken lines). Stratigraphy signatures are as in the relevant pollen diagram.

Age/depth curves and associated probability envelopes are as follows:

BHY III: third order polynomial regression curve constrained by available  $^{14}\text{C}$  dates and a surface-age estimate;

BHY IV: smooth spline curve (smooth factor = 0.1), constrained by available  $^{14}\text{C}$  dates;

BHY V: third order polynomial regression curve, constrained by available  $^{14}\text{C}$  dates;

BHY VI: smooth spline curve (smooth factor = 0.3), constrained by the four available  $^{14}\text{C}$  dates and a surface-age estimate;

CF Ib: linear regression line fitted to the available  $^{14}\text{C}$  dates. The result of calibration (probability curve by CLAM) of the single  $^{14}\text{C}$  date from the plough fill is also plotted.

**Figure S2b.** Age/depth relationship for profiles GLU IV (Glenulra) and GRN I (Garrynagran), generated by CLAM. PAZs and PAZ-boundary ages (derived from the age/depth curves) and location of tephra layers are shown. Stratigraphy signatures are as in the respective pollen diagrams. Additional details follow (see also legend for Fig. S2a).

GLU IV: fifth order polynomial regression curve. All  $^{14}\text{C}$  dates were used but dates  $1820\pm50$  BP and  $5100\pm80$  BP (near top and at base, respectively) were specified within CLAM as outliers (shown in red). The mid-Holocene Elm Decline (ED), 'pine flush' (PF) and the Late Iron Age Lull (LIAL) are indicated but these were not used in constructing the chronology.

GRN I: smooth spline (smooth factor 0.4) fitted to the available  $^{14}\text{C}$  dates (derived from peat pine timbers), except the uppermost  $^{14}\text{C}$  date (in red) which was regarded as too young. This and the lowermost date are shown but these  $^{14}\text{C}$  dates are not positioned with respect to the axes. The position of the ED and PF are indicated but are not used in constructing the chronology.

# GLU IV (Céide Fields)

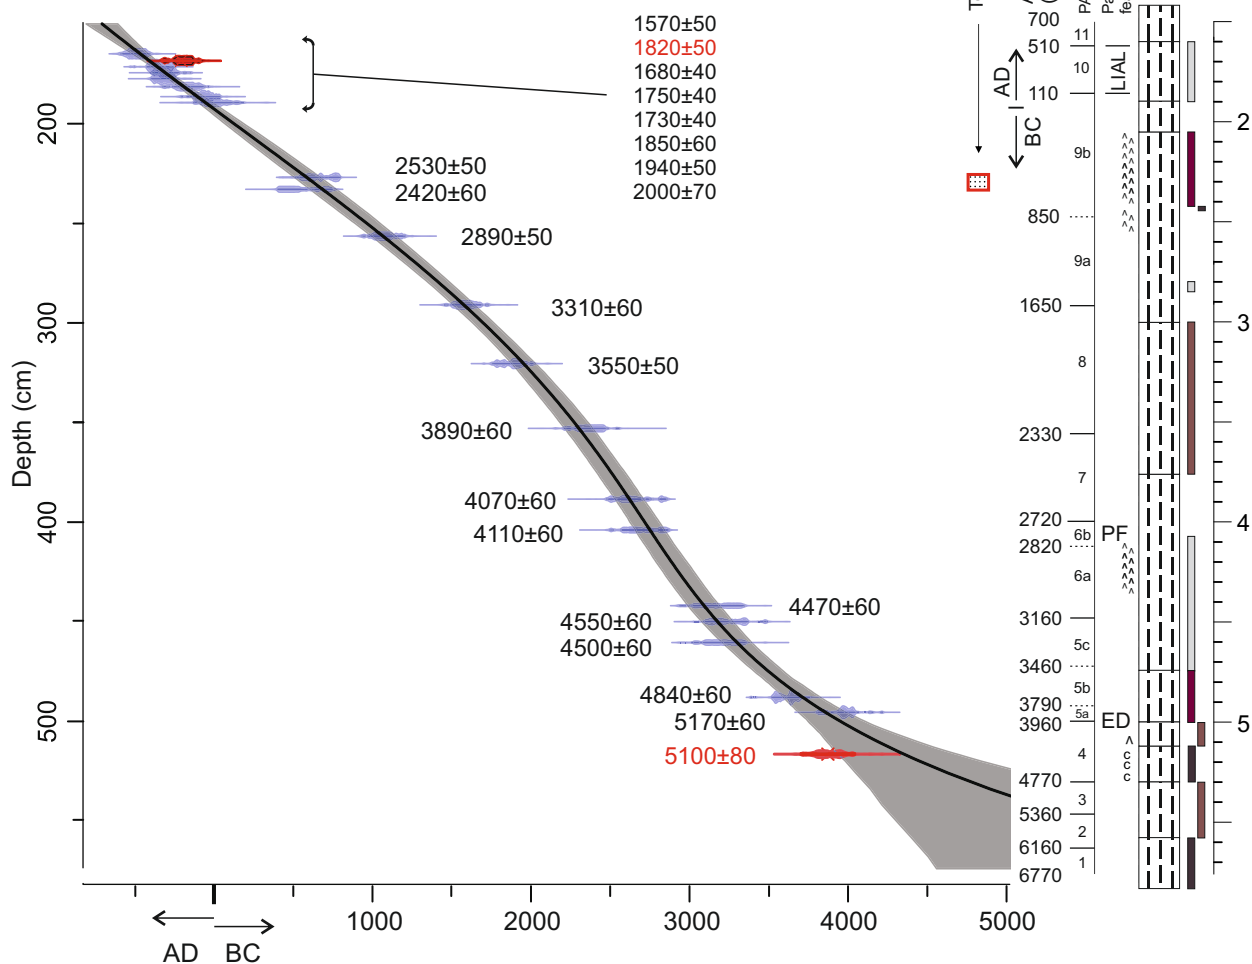

# Garrynagran GRN I

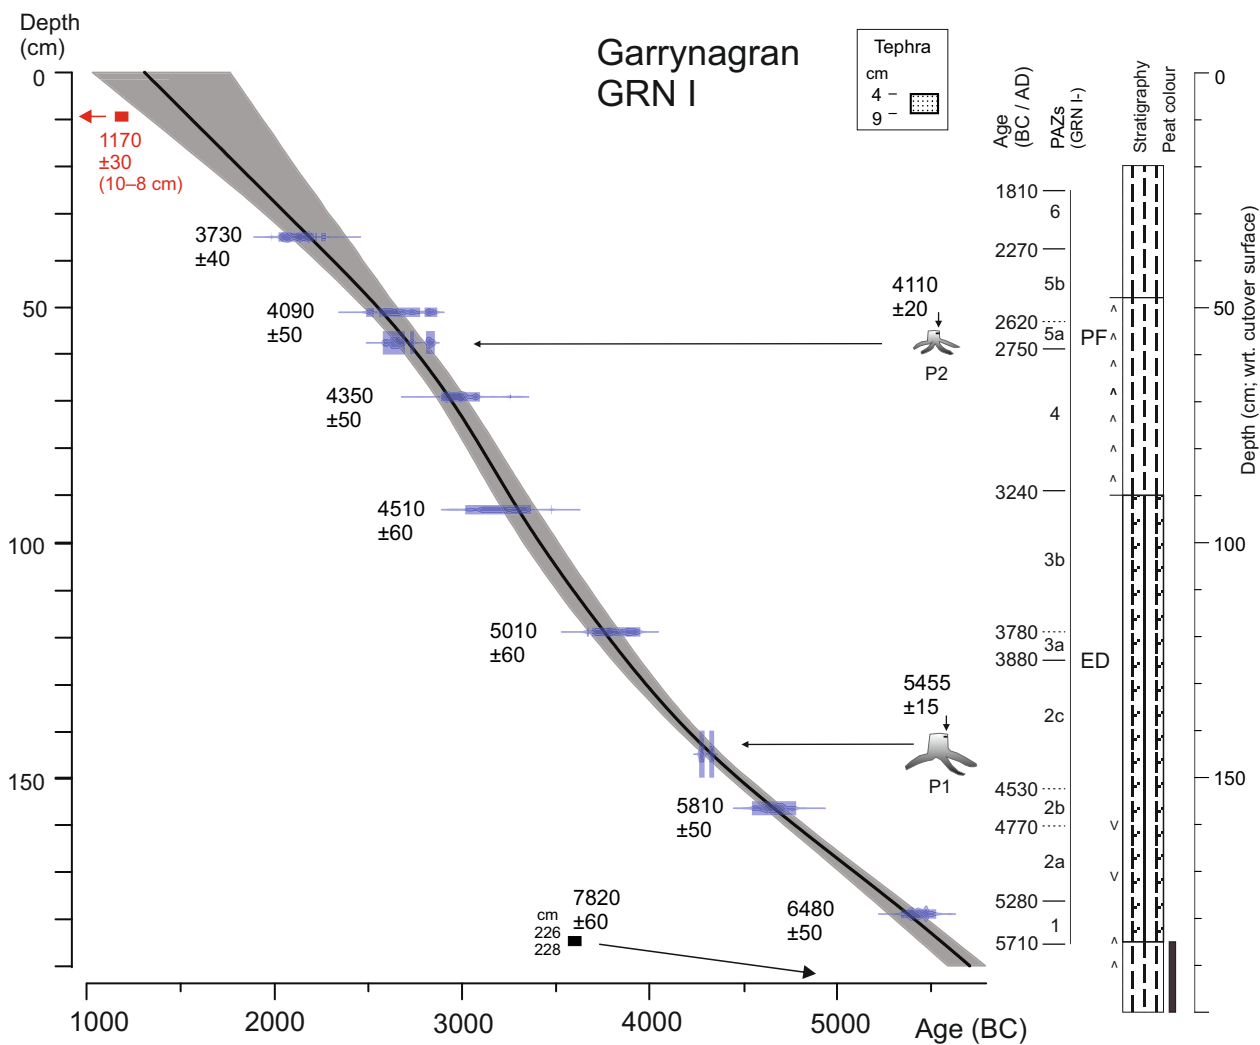

Supplement: Supplementary file 1 [file egqsj-69-1-2020-supplement.zip › Fig S2_age-depth-curves_BHY_GLU4_GRN1_chron1.pdf]
