# Supplementary material for: Long-term human impact and environmental change in mid-western Ireland, with particular reference to Céide Fields – an overview
Source: Copernicus journal article supplement (doi:10.5194/egqsj-69-1-2020), 2020-02-11

**Figure S8a. Céide Fields (Behy / Glenultra) (SM in EGJQS, 2019)** Photos: M. O'Connell

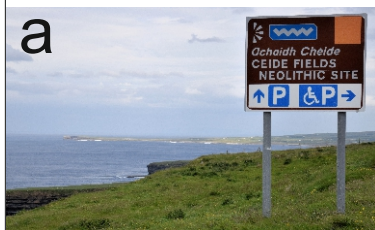

a: Signage for Céide Fields Visitor Centre (VC) (14/06/2019).

b: Section of pre-bog stone wall. View to the north with VC and Atlantic Ocean, and uplands of south Donegal in the distant background (20/10/2010).

c: View to west of Behy court tomb and cairn (excavated in 1960s and now covered by a mossy mound) surrounded by extensive blanket bog. *Juncus* (rush) in the foreground. The uplands to west of Belderrig and the Atlantic Ocean are visible in the background (20/10/2010).

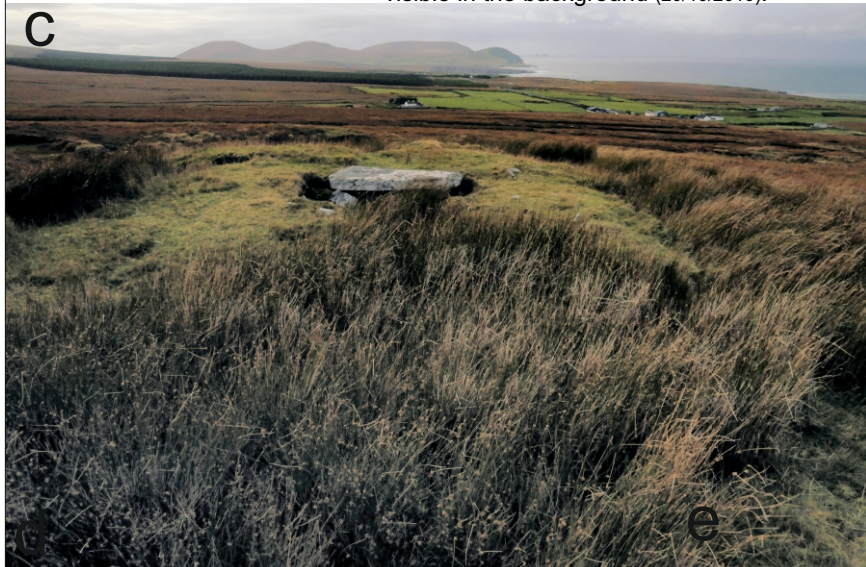

d: Basal peat at BHY V. Note two bands of charcoal-rich peat, the lower distinct (large scale div. = 10 cm) (18/01/1992).

e: Peat face from where BHY VI had earlier been removed (main intervals on ruler = 10 cm) (29/04/1995).

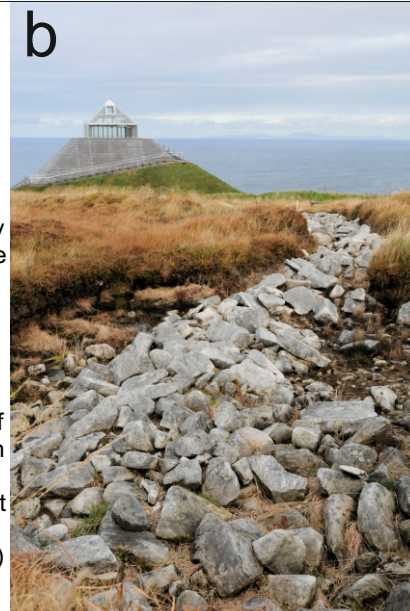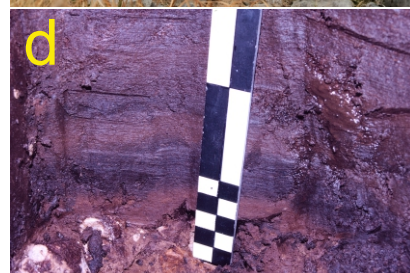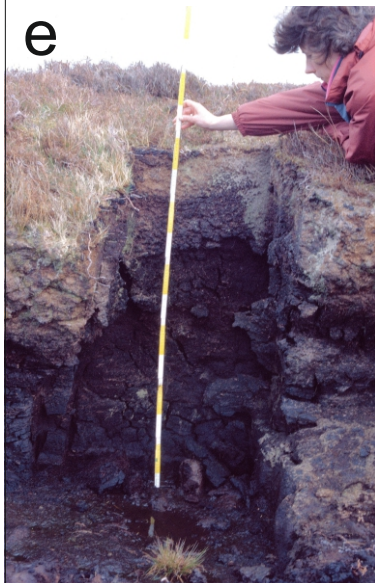

i: Plough mark and parent mineral soil from pre-peat context beneath the VC; recovered during excavation prior to construction work; scale: 10 cm; sample kindly made available by G. Byrne (04/1992).

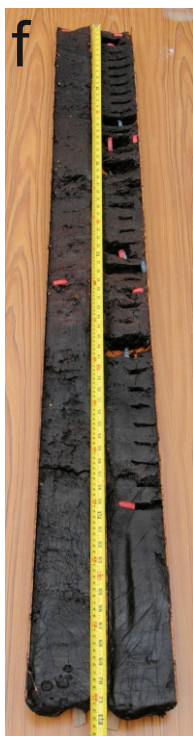

f: Core GLU IV, lower part (collected 1992; photographed after sampling 7/05/2010).

g: Photograph taken from the approx. location of GLU IV in Glenultra basin. To the left are the lower slopes of Céide Hill where the main field-wall system is occluded by peat; the VC is in the background (17/06/2017).

h: View to west of sectioned wall beside VC. Cores CF III and CF Ib are from on north of the wall and beneath the wall, respectively (19/09/1993).

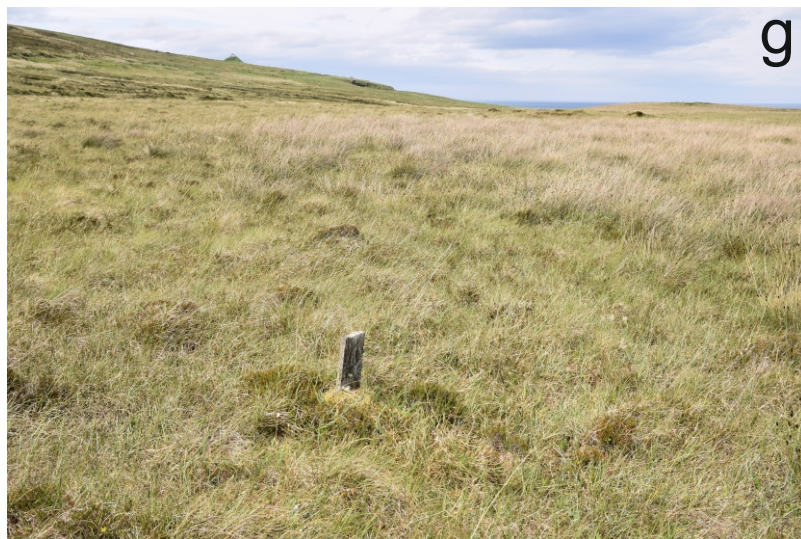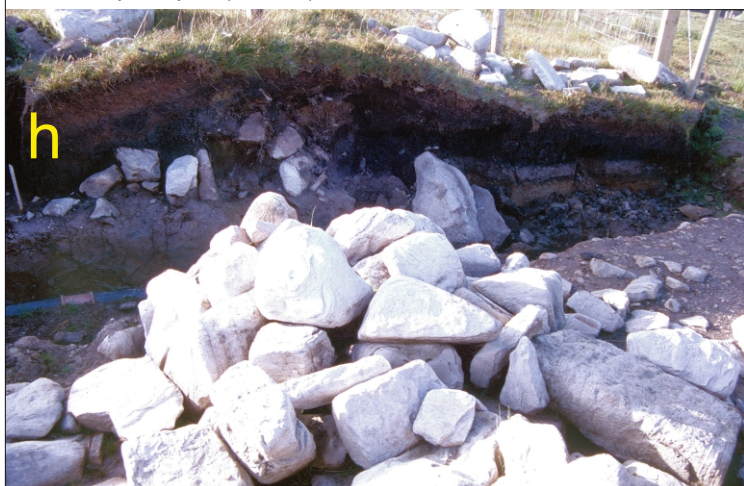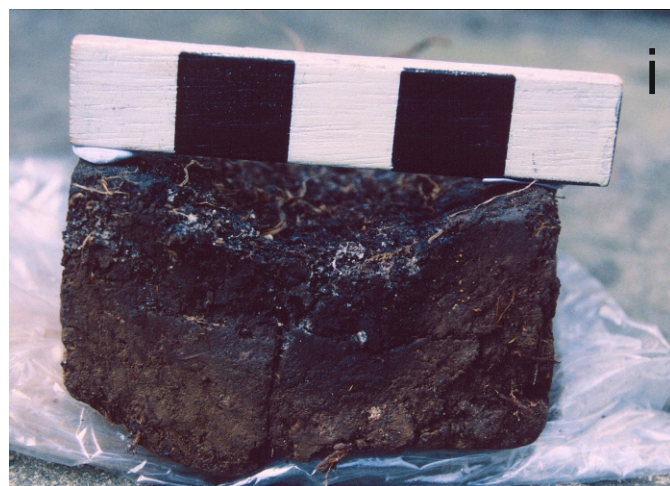

**Figure S8b.** Belderrig, Co. Mayo (SM in EGJQS,

Photos: M. O'Connell

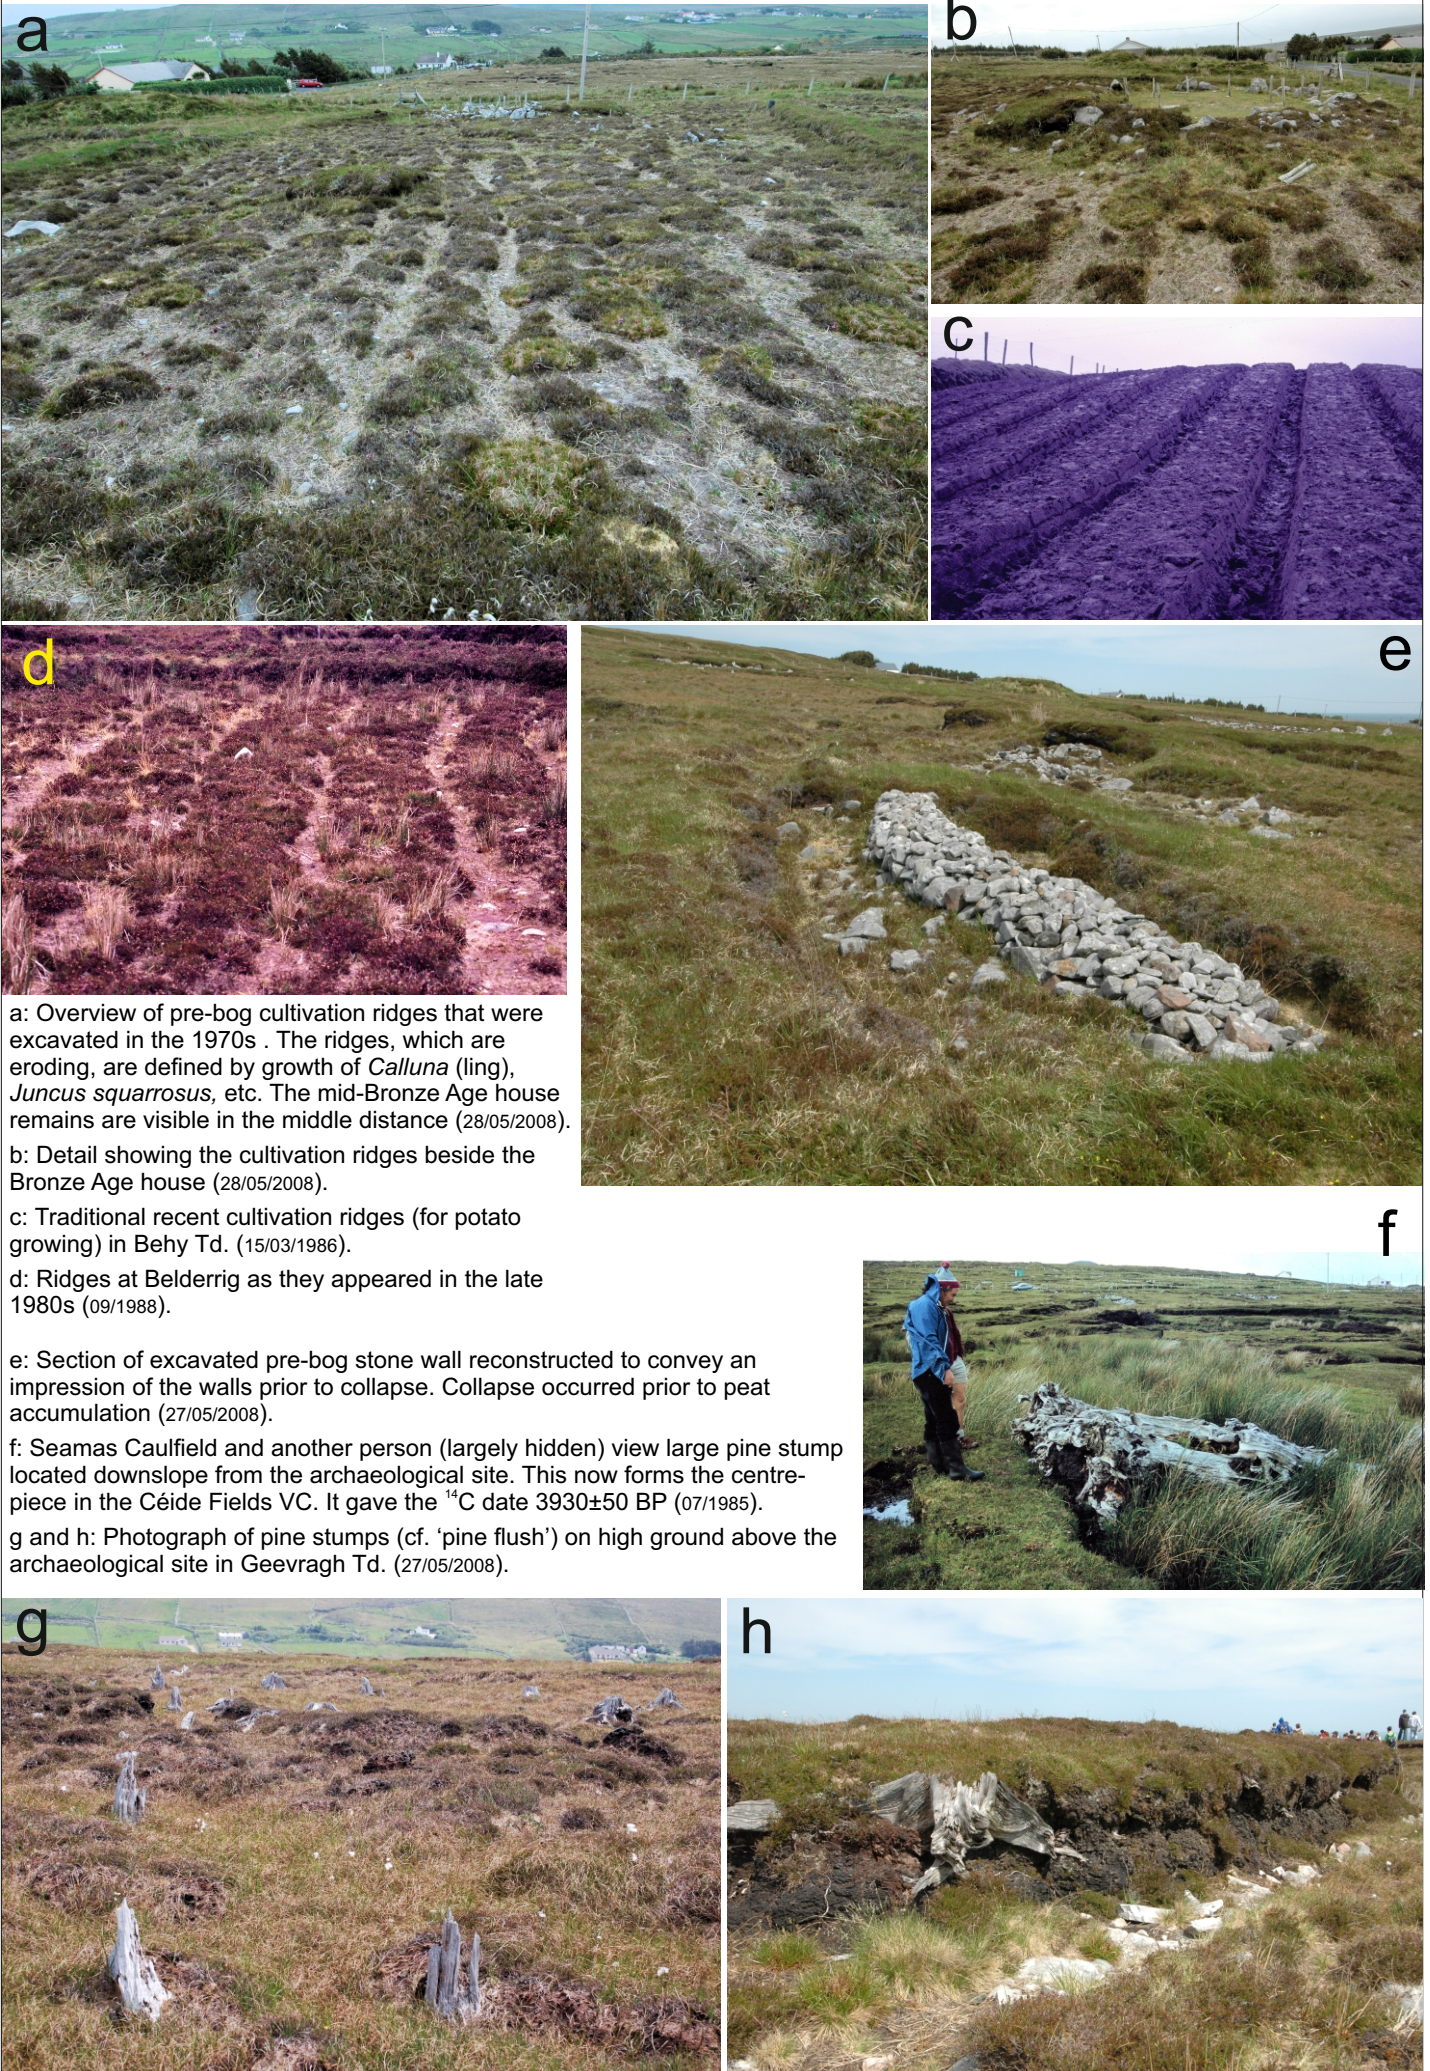

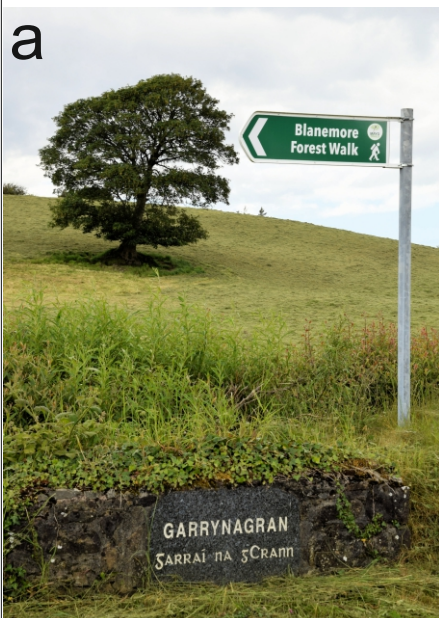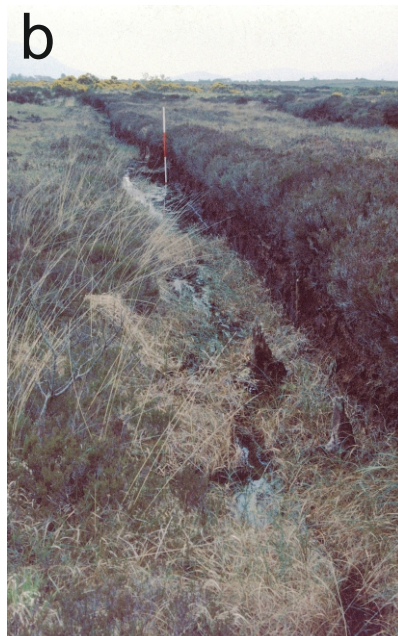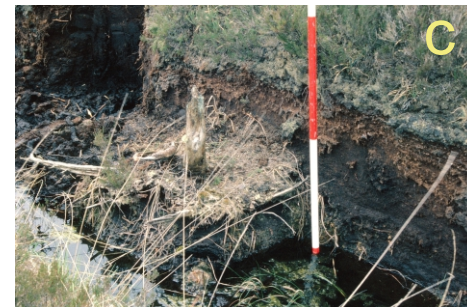

a: Signage for Blanemore and Garrynagran on R315 2.3 km to east of GRN I core location (2/06/2019). Photos (a) – (f) relate to Garrynagran.

b: View to west of peat bank where GRN I was taken. Sampling point is immediately to east of the ranging rod. Two pine stumps can be seen in ditch in the foreground (15/05/1994).

c: Cutting from which GRN I was removed is on top left-hand side. A small pine stump (P2) is exposed but still in situ (ranging rod divisions = 50 cm; 19/05/1994).

d: Sampling a large pine stump (cf. G26) by P. O'Rafferty (19/07/1994).

e: Pine timbers. The large stump in (d) is in the mid-background; another large sampled stump (cf. G29) is in the foreground.

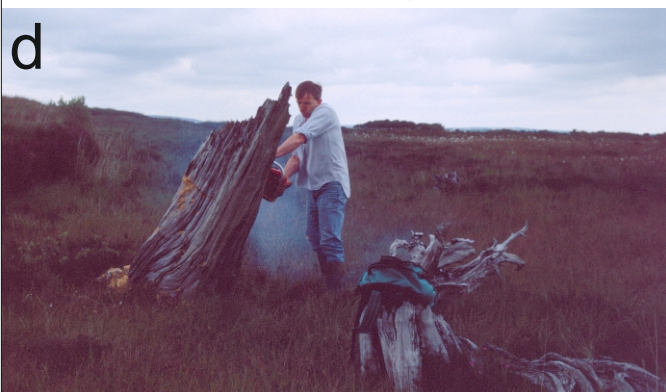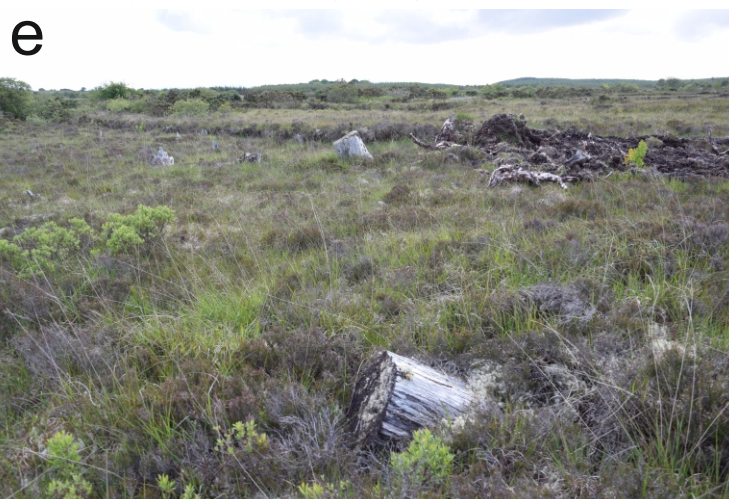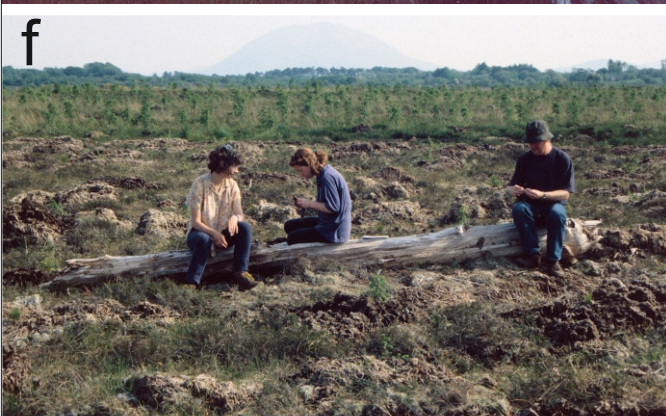

f: One of three long oak trunks that were dendrochronologically dated (K. Molloy, E. Jennings and J. Daniell in photo; 15/06/1996).

g: View to the south-west of court tomb at Blanemore. This and other megaliths lie within ca. 1.5 km west of GRN I (2/06/2019).

h: Plan of court tomb (after de Valéra and Ó Nualláin 1964) (tomb Mo 43; SMR No. MA021-044). Structural stones are hatched; other stones not hatched.

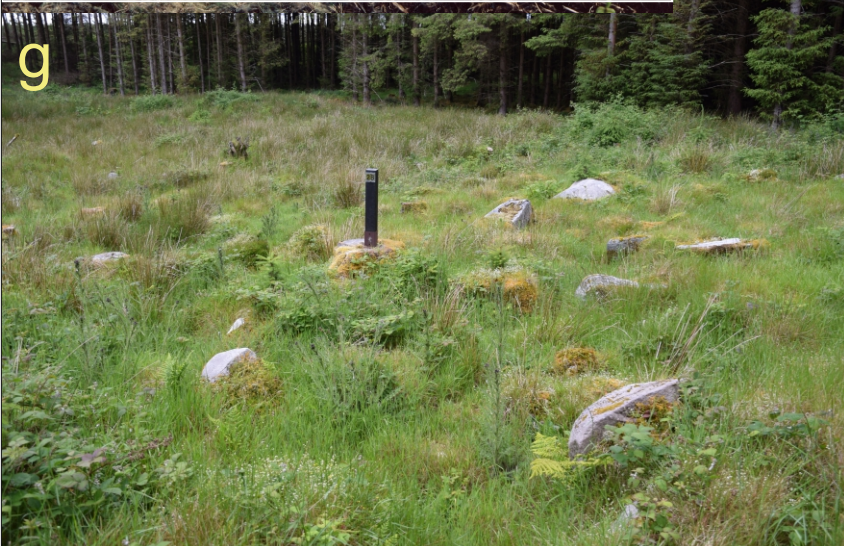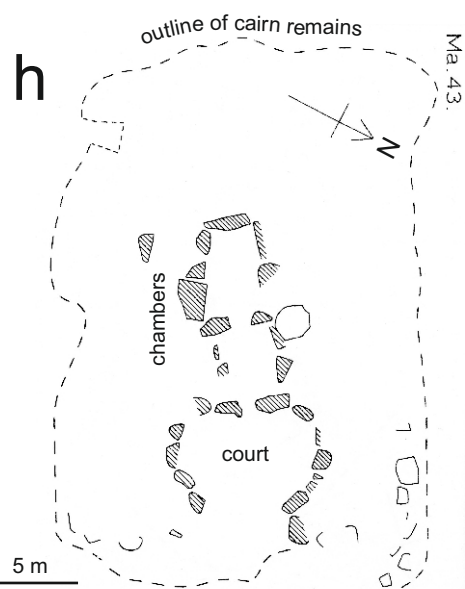

Supplement: Supplementary file 1 [file egqsj-69-1-2020-supplement.zip › Fig S8_photos_CeideF_Belderrig_Garrynagran1a.pdf]
