# Supplementary material for: Long-term human impact and environmental change in mid-western Ireland, with particular reference to Céide Fields – an overview
Source: Copernicus journal article supplement (doi:10.5194/egqsj-69-1-2020), 2020-02-11
Supplement: Supplementary file 1 [file egqsj-69-1-2020-supplement.zip]

Archive with 7 entries (7 files):
- Fig S1_BHY1-1-Moore 1979_Belderg_BourkeD-1972.pdf
- Fig S8_photos_CeideF_Belderrig_Garrynagran1a.pdf
- Table S1_tables_chronology_pollen-profiles_pine-timbers-locations_a.xlsx
- Figs S3-S7_BHY_CF-profiles.pdf
- egqsj-69-1-2020-supplement-title-page.pdf
- Fig S2_age-depth-curves_BHY_GLU4_GRN1_chron1.pdf
- Table S2_pollen summaries_S1a GLU IV_S2b GRN I.docx
