# Supplementary material for: Long-term human impact and environmental change in mid-western Ireland, with particular reference to Céide Fields – an overview
Source: Copernicus journal article supplement (doi:10.5194/egqsj-69-1-2020), 2020-02-11
Supplement: Supplementary file 1 [file egqsj-69-1-2020-supplement.zip › egqsj-69-1-2020-supplement-title-page.pdf]

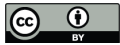

## *Supplement of*

# **Long-term human impact and environmental change in mid-western Ireland, with particular reference to Céide Fields – an overview**

**Michael O’Connell et al.**

*Correspondence to:* Michael O’Connell ([michael.oconnell@nuigalway.ie](mailto:michael.oconnell@nuigalway.ie))

- [egqsj-69-1-2020-supplement-title-page.pdf](#)
- [Fig S1\\_BHY1-1-Moore 1979\\_Belderg\\_BourkeD-1972.pdf](#)
- [Fig S2\\_age-depth-curves\\_BHY\\_GLU4\\_GRN1\\_chron1.pdf](#)
- [Fig S8\\_photos\\_CeideF\\_Belderrig\\_Garrynagran1a.pdf](#)
- [Figs S3-S7\\_BHY\\_CF-profiles.pdf](#)
- [Table S1\\_tables\\_chronology\\_pollen-profiles\\_pine-timbers-locations\\_a.xlsx](#)
- [Table S2\\_pollen summaries\\_S1a GLU IV\\_S2b GRN I.docx](#)

The copyright of individual parts of the supplement might differ from the CC BY 4.0 License.
