# Supplementary material for: Long-term human impact and environmental change in mid-western Ireland, with particular reference to Céide Fields – an overview
Source: Copernicus journal article supplement (doi:10.5194/egqsj-69-1-2020), 2020-02-11
Supplement: Supplementary file 1 [file egqsj-69-1-2020-supplement.zip › Figs S3-S7_BHY_CF-profiles.pdf]

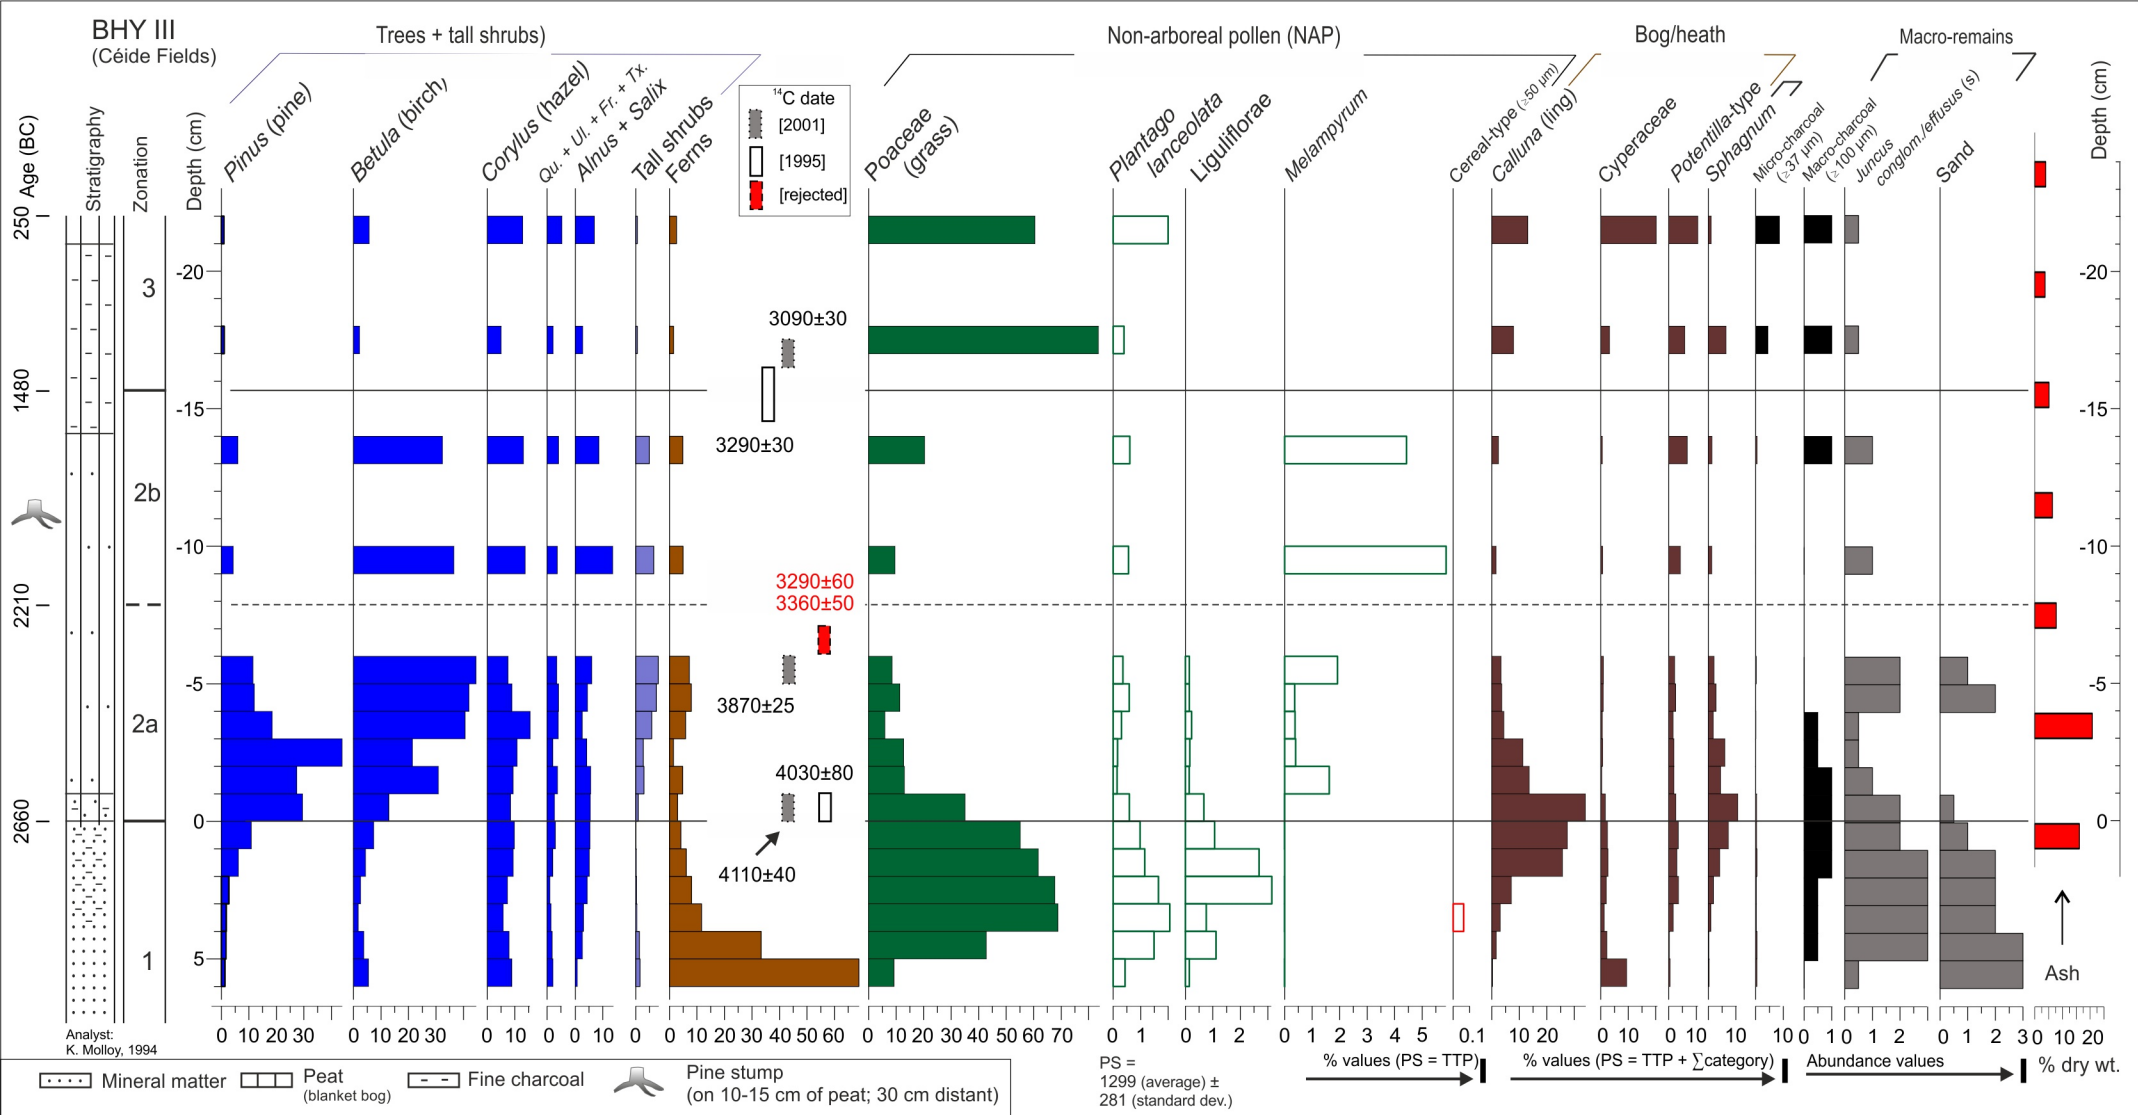

**Figure S3.** Percentage pollen profile BHY III, Céide Fields.

A magnified x-axis scale is used for *P. lanceolata*, *Liguliflorae* and *Melampyrum* (x10), and cereal-type (x50). Macro-remains and ash content are also plotted and  $^{14}\text{C}$  dates (where relevant, the year of publication is given) are indicated. Colour/darkness of the peat is indicated schematically. Abbreviations (pollen taxa names): *Qu.*, *Quercus*; *Ul.*, *Ulmus*; *Fr.*, *Fraxinus*; *Tx.*, *Taxus*.

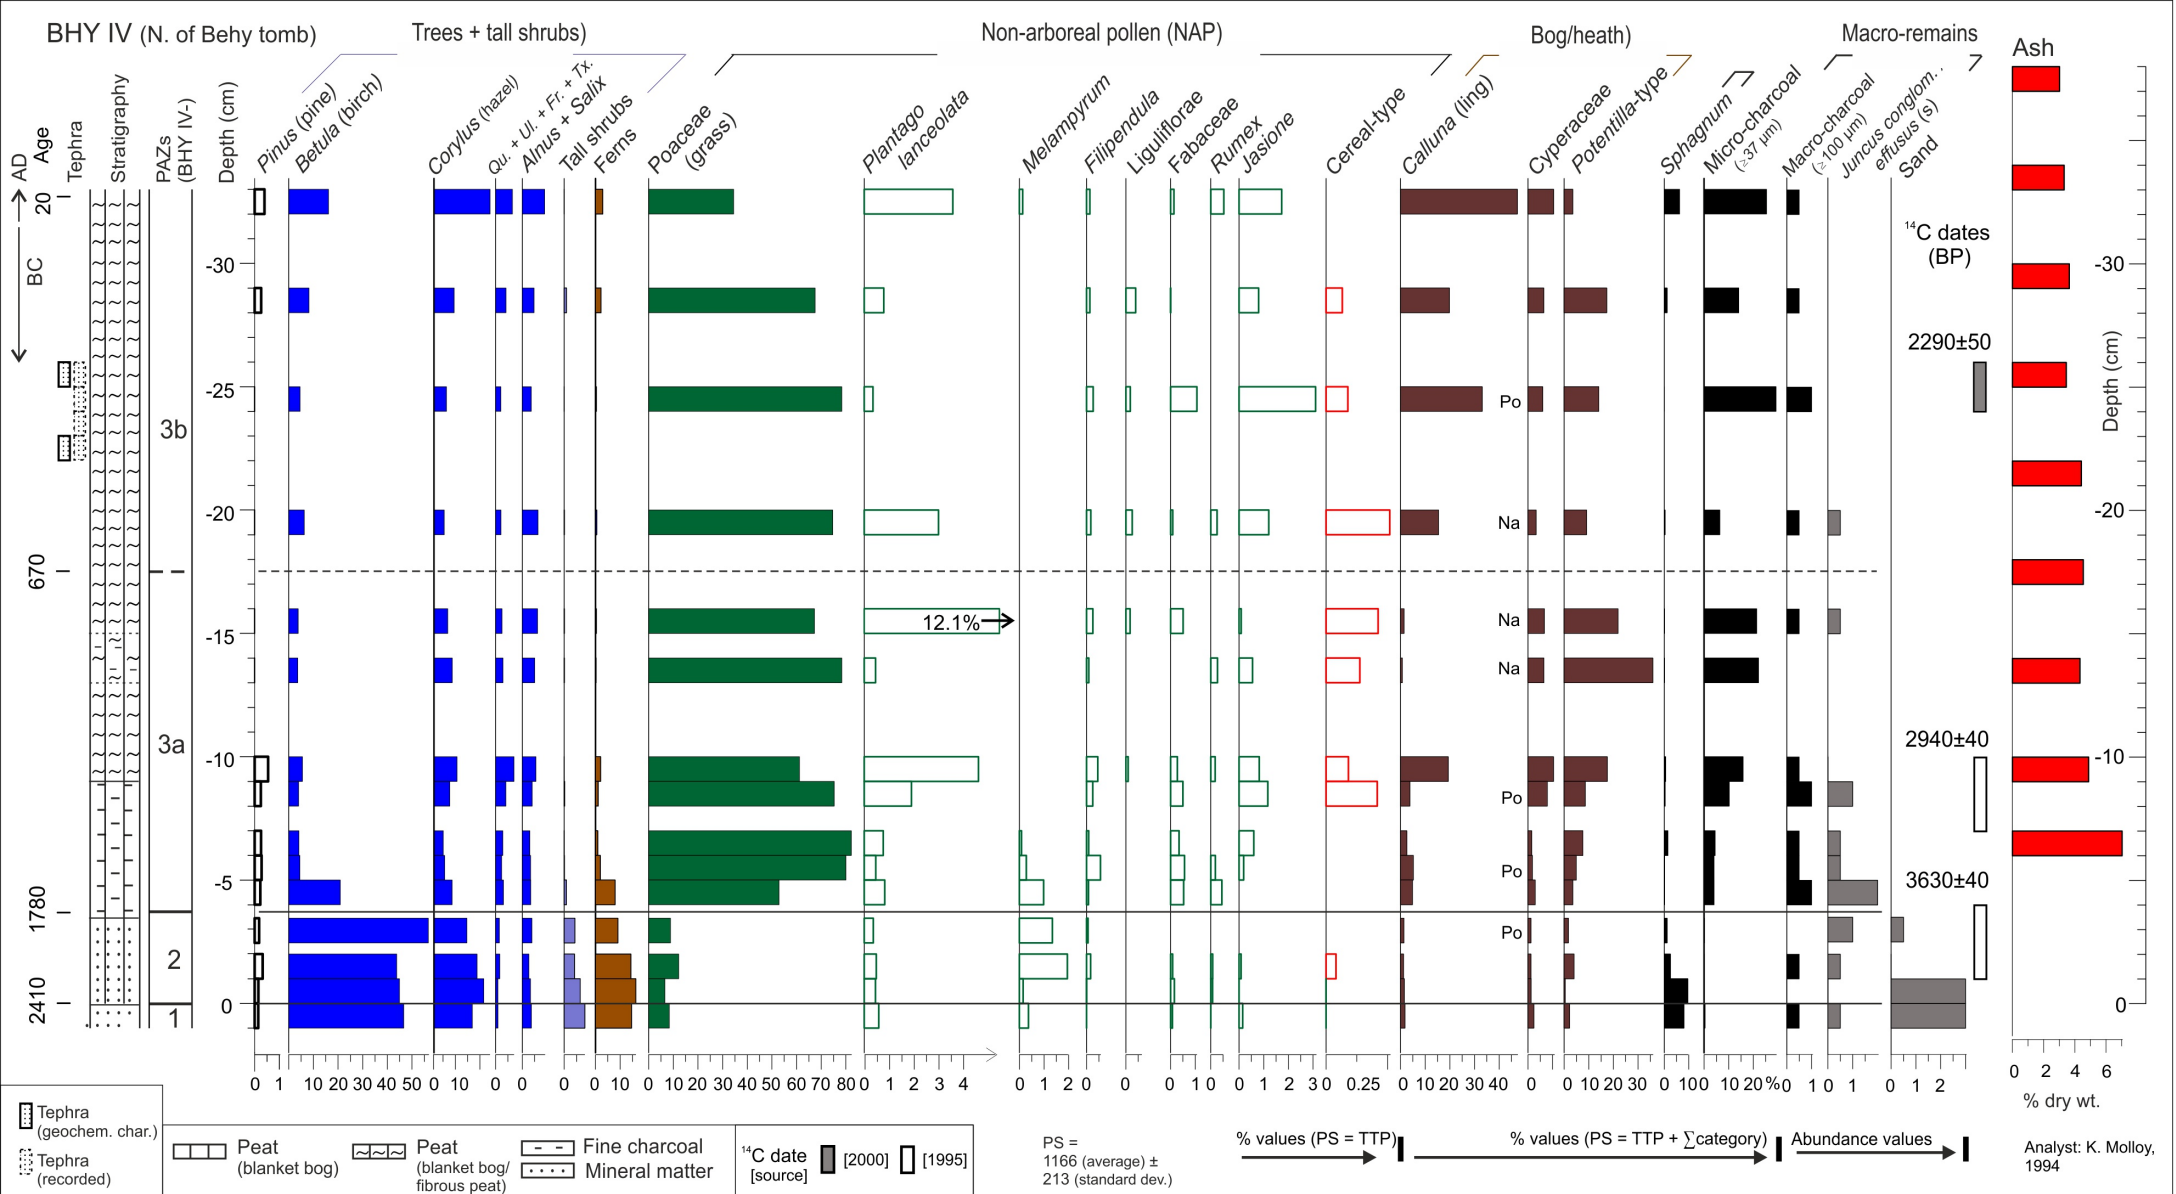

**Figure S4.** Percentage pollen profile BHY IV, Céide Fields.

The x-axis scale is magnified where non-filled histograms are used (x10, except cereal-type which is x50). Macro-remains and tephra records are shown. <sup>14</sup>C dates (the year of publication or the year obtained is indicated, i.e. 1995 (non-filled) or 2000, respectively) and ash content are also shown. Abbreviations (minor pollen taxa): *Na*, *Narthecium*; *Po*, *Potamogeton* sect. *Eupotamogeton*.

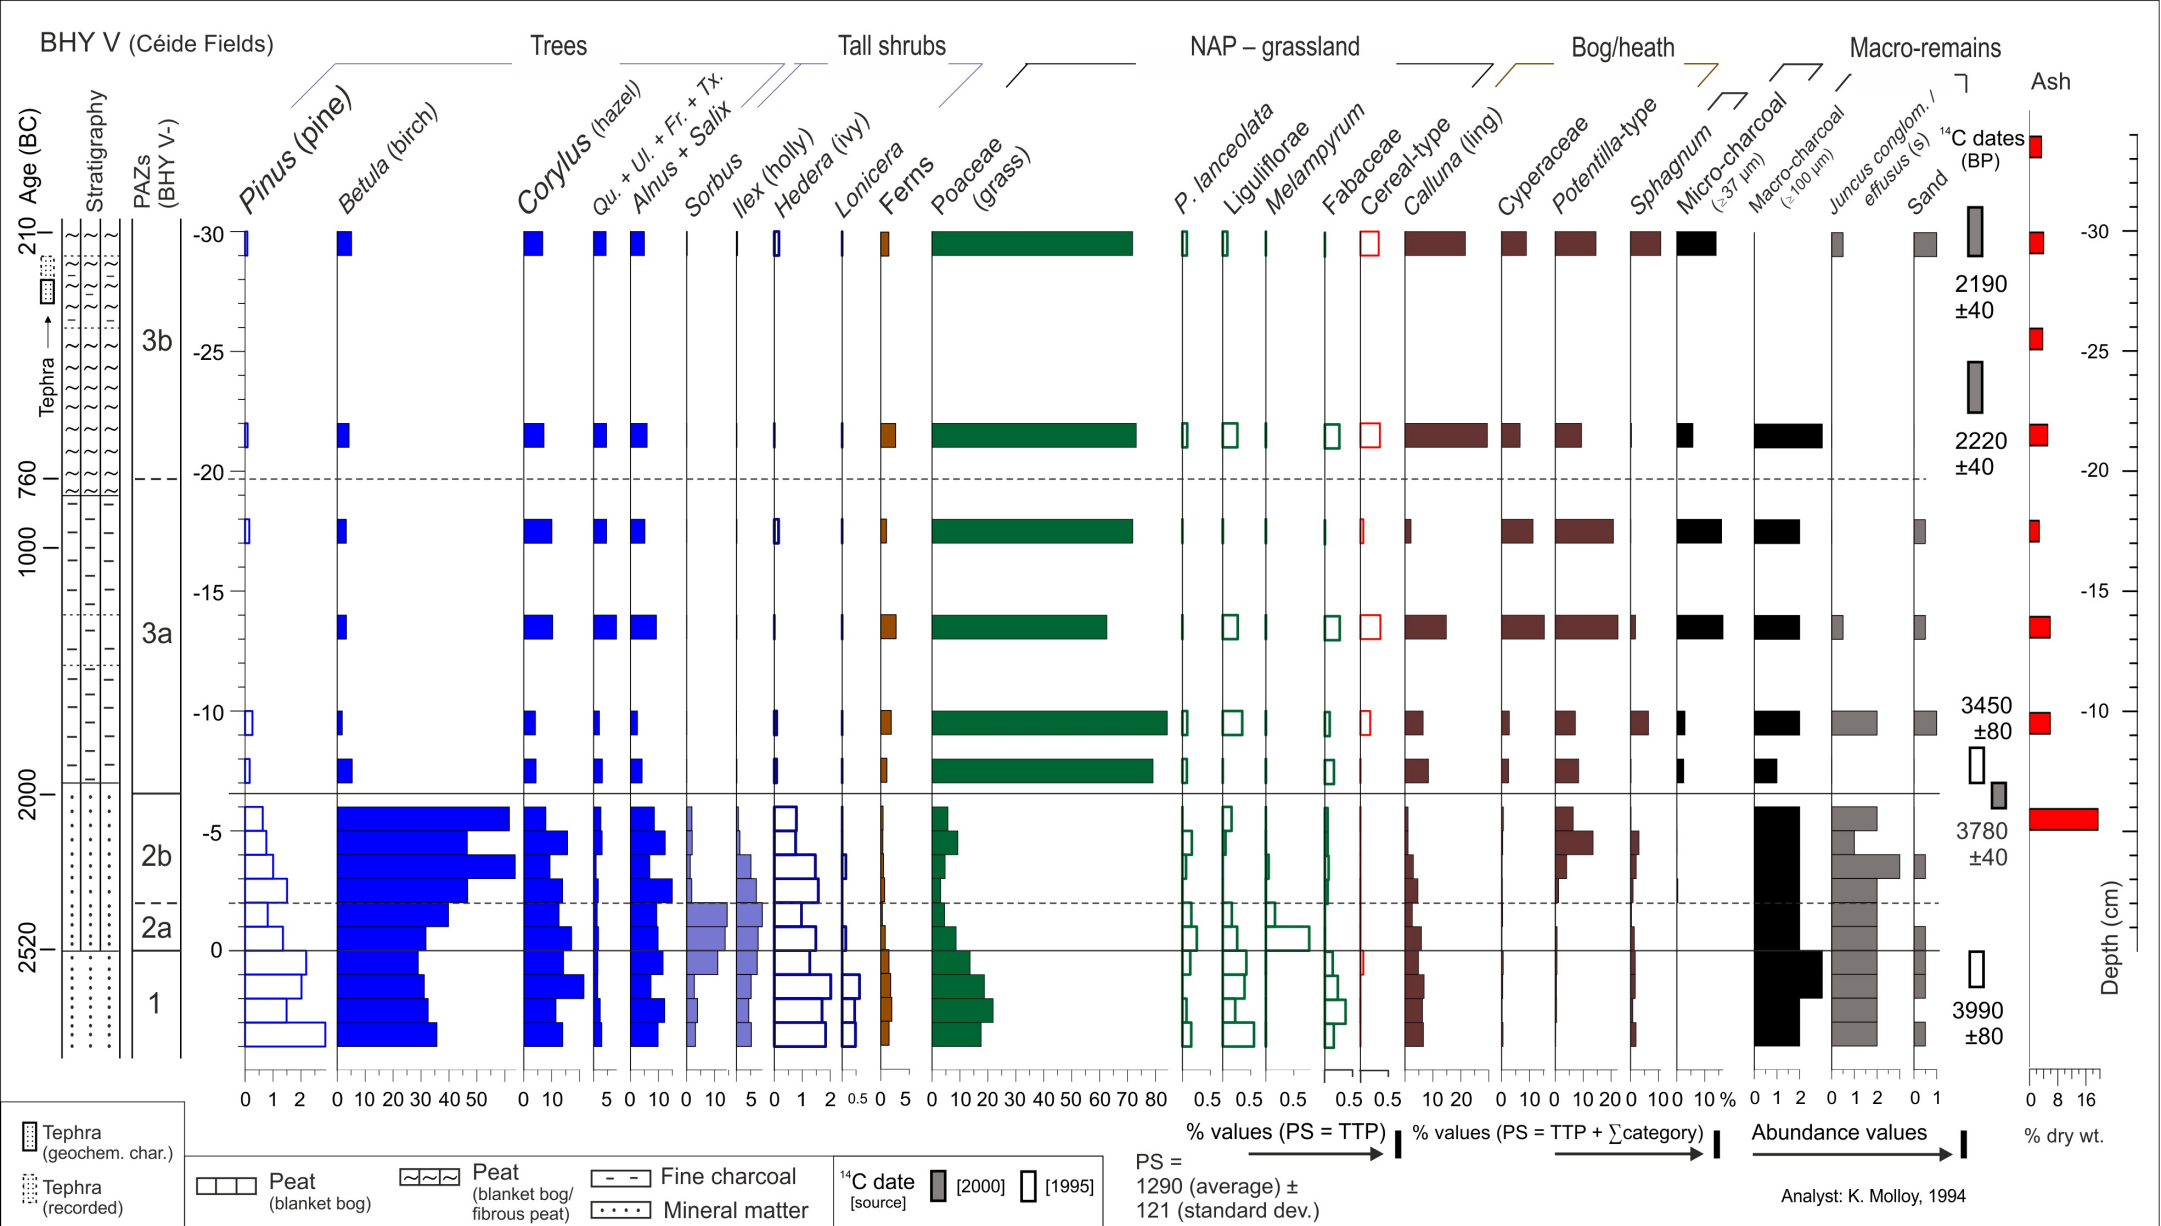

**Figure S5.** Percentage pollen profile BHY V, Céide Fields.

The x-axis scale is magnified where non-filled histograms are used (x10). Macro-remains and tephra records are shown. <sup>14</sup>C dates (the year of publication or the year obtained is indicated, i.e. 1995 (non-filled) or 2000, respectively) and ash content are also shown.

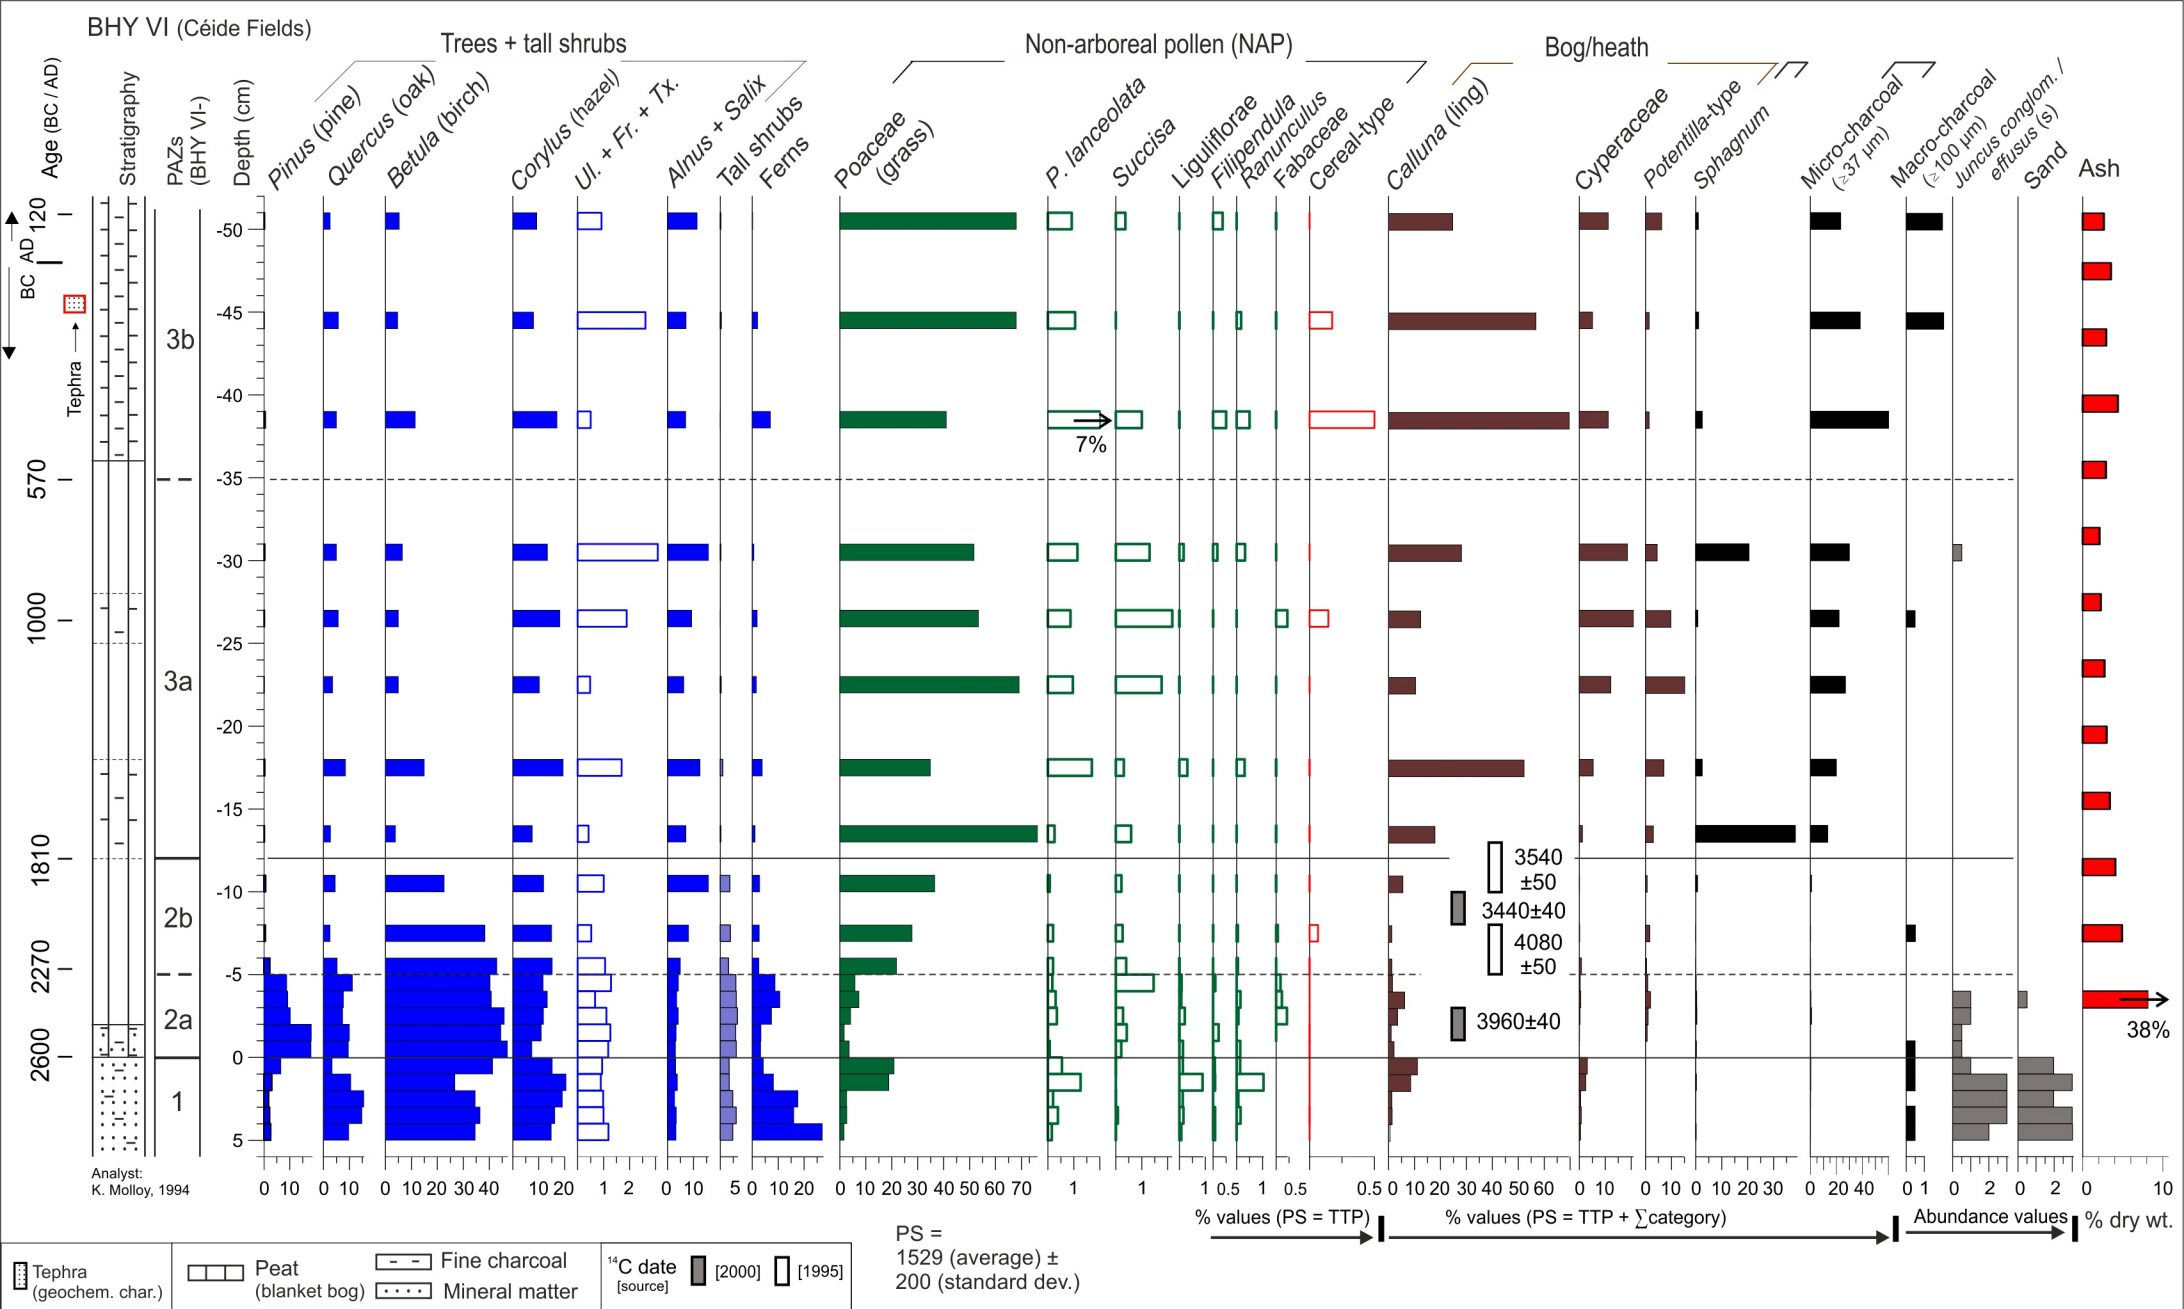

**Figure S6.** Percentage pollen profile BHY VI, Céide Fields. The x-axis scale is magnified where non-filled histograms are used (x10; x50 for cereal-type). Macro-remains and tephra records are shown. <sup>14</sup>C dates (the year of publication or the year obtained is indicated, i.e. 1995 (non-filled) or 2000, respectively) and ash content are shown.

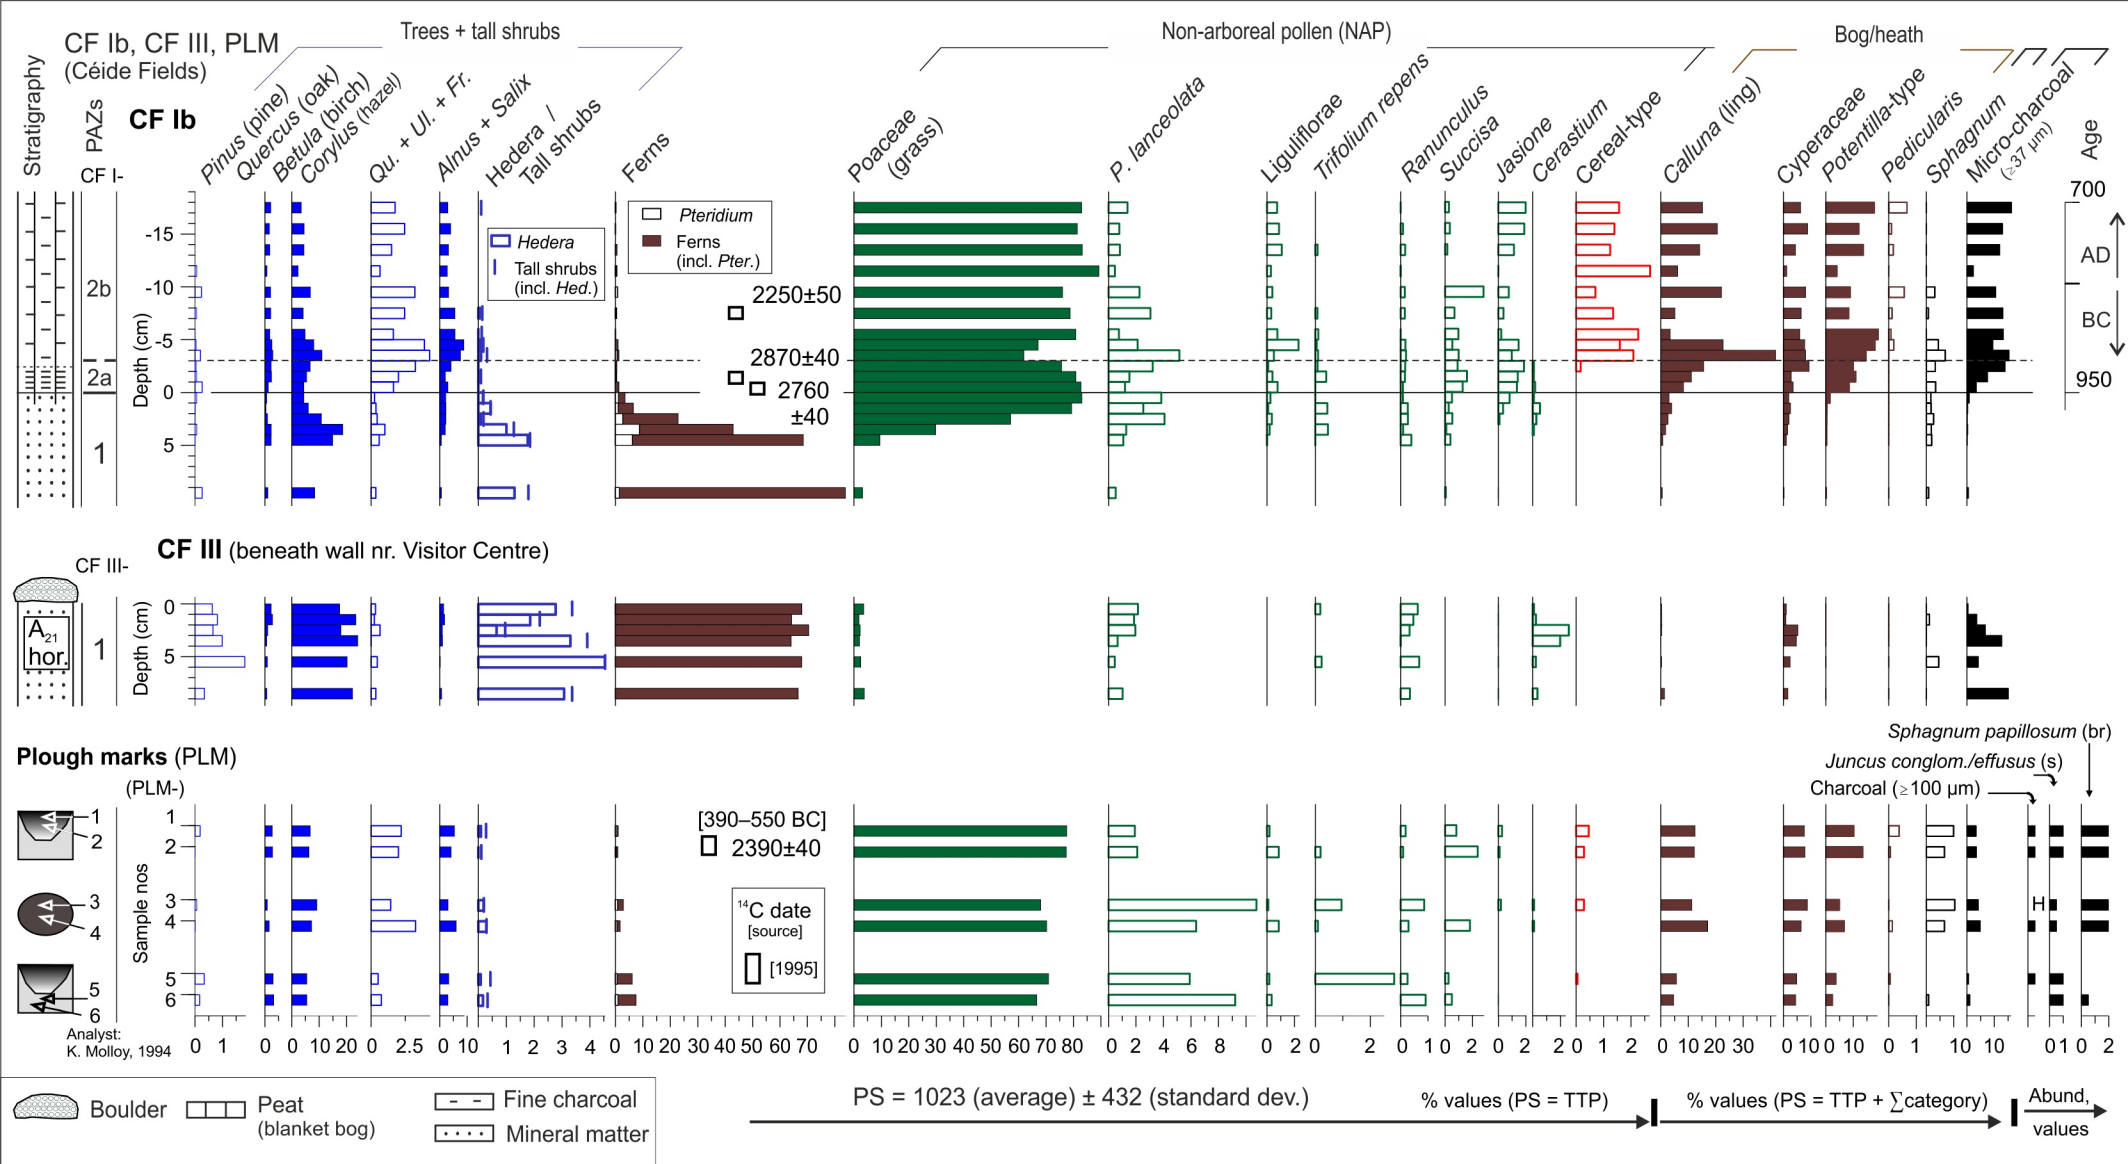

**Figure S7.** Percentage pollen data, profiles CF I, CF III and mineral soil (plough marks) samples. Non-filled histograms are used to highlight a magnified x-axis. Macroremains are plotted (plough marks only; few remains (mainly *Juncus*) in other samples).  $^{14}\text{C}$  dates (dates from 1995 publication only available) are shown. Plough marks and origin of samples are depicted schematically, i.e. infill of plough mark, the surrounding soil and loose infill (shown within an oval); arrows indicate origin of sample material within each context. Pollen sum (PS) data is based on all the spectra (30) presented. Abbreviations: Qu., *Quercus*; Ul., *Ulmus*; Fr., *Fraxinus*; Hed. *Hedera*; H, *Hypnum* cf. *cupressiforme* (*sensu lato*) (lf); hor., horizon; (br), branch; (lf), leaf; (s), seed.
