# Supplementary material for: Long-term human impact and environmental change in mid-western Ireland, with particular reference to Céide Fields – an overview
Source: Copernicus journal article supplement (doi:10.5194/egqsj-69-1-2020), 2020-02-11
Supplement: Supplementary file 1 [file egqsj-69-1-2020-supplement.zip › Table S1_tables_chronology_pollen-profiles_pine-timbers-locations_a.xlsx]

## Sheet: Tab S1c_14C pollen profiles cal
Table S1c	14C dates BHY series KM/MOC (1995) + 3 dates addition dates from BHY III + 6 dates in 2000; also Garrynagran (GRN I) 14C dates
Calibration by OxCal 4.3 Bronk Ramsey 2019, using IntCal 13; 08/2019
14C Lab. No.	Galway No.	Depth (cm)	Depth (cm)	Depth	14C date	+/-			cal. age range; prob: 68.2%			cal. age range; prob: 95.4%			cal. age range; prob: 99.7%						Tephra (depth cm)	Poaceae/Betula boundary (cm)	When date obtained	TDP (total depth of peat; cm)	adj TDP	Additional info/remarks
		(bot)	(top)	(mid pt)	(y BP)	(1 s)	d13C (‰)		from	to		from	to		from	to		μ	σ	median
BHY III																					No tephra
GrN-23499	BHY III-5	-16.5	-17.5	-17	3090	30	-		-1411	-1302		-1427	-1277		-1446	-1226		-1350	43	-1346			KM/MOC98	130	180
GrN-20031	BHY III (5)	-16.5	-14.5	-15.5	3290	30	-29.03		-1611	-1531		-1633	-1501		-1686	-1452		-1568	37	-1568		P/B: -16	KM/MOC95
GrN-23498	BHY III-4	-5	-6	-5.5	3870	25	-		-2453	-2294		-2463	-2234		-2470	-2206		-2362	59	-2362			KM/MOC98
Gd-6693	BHY III-1	0	-1	-0.5	4030	80	-		-2840	-2465		-2872	-2346		-2892	-2209		-2593	136	-2577			KM/MOC95
GrN-23497	BHY III-3	0	-1	-0.5	4110	40	-		-2855	-2582		-2871	-2505		-2881	-2491		-2705	93	-2689			KM/MOC98
Suspect dates; not accepted
Gd-7147	BHY III-2	-6	-7	-6.5	3360	50	-		-1738	-1565		-1762	-1511		-1881	-1462		-1651	68	-1652			KM/MOC95
Gd-7148	BHY III-2	-6	-7	-6.5	3290	60	-		-1632	-1501		-1730	-1438		-1869	-1396		-1573	68	-1571			KM/MOC95			repeated run on same CO2 obtained from combustion of organic matter
BHY IV
GrN-24950	BHY IV-5	-24	-26	-25	2290	50	-		-403	-234		-471	-201		-729	-170		-329	74	-353	T: -22 to -26			120	170
GrN-20030	BHY IV (4)	-7	-10	-8.5	2940	40	-29.39		-1215	-1059		-1261	-1018		-1378	-942		-1143	64	-1146			Obtained 2000
GrN-20029	BHY IV (3)	-1	-4	-2.5	3630	40	-29.43		-2112	-1936		-2134	-1892		-2197	-1781		-2001	62	-1995		P/B: -4	Obtained 2000
																							KM/MOC95
BHY V
GrN-24953	BHY V-5	-29	-31	-30	2190	40	-		-357	-197		-380	-120		-393	-61		-268	64	-276	T: -26 to -30		Obtained 2000	130	180
GrN-24952	BHY V-4	-25	-27	-26	2220	40	-		-361	-209		-387	-197		-401	-114		-283	56	-281			Obtained 2000
Gd-6696	BHY V-2	-7	-8.5	-7.75	3450	80	-		-1882	-1683		-1965	-1534		-2129	-1496		-1771	102	-1769			KM/MOC95
GrN-24951	BHY V-3	-6	-7	-6.5	3780	40	-		-2283	-2141		-2342	-2042		-2458	-2031		-2208	72	-2206		P/B: -7	Obtained 2000
Gd-6694	BHY V-1	1.5	0	0.75	3990	80	-		-2625	-2348		-2862	-2233		-2881	-2151		-2521	138	-2518			KM/MOC95
BHY VI																					T: -44 to -48
																						P/B: -13		120	160
GrN-20028	BHY VI (2)	-10	-13	-11.5	3540	50	-29.08		-1944	-1775		-2022	-1744		-2129	-1686		-1870	74	-1875			KM/MOC95
GrN-24955	BHY VI-4	-8	-10	-9	3440	40	-		-1871	-1688		-1881	-1658		-1910	-1616		-1760	64	-1750			Obtained 2000
GrN-20027	BHY VI (1)	-5	-8	-6.5	4080	50	-29.34		-2850	-2499		-2866	-2485		-2877	-2471		-2662	107	-2643			KM/MOC95
GrN-24954	BHY VI-3	-1	-3	-2	3960	40	-		-2568	-2356		-2576	-2340		-2625	-2286		-2471	70	-2478			Obtained 2000
CF I and plough fill
GrN-20632	CF I-2	-7	-8	-7.5	2250	50	-28.88		-389	-211		-399	-201		-431	-96		-296	62	-288			KM/MOC95	50
GrN-21116	CF I-3	-1	-2	-1.5	2870	40	-29.26		-1115	-981		-1193	-923		-1228	-897		-1047	64	-1044			KM/MOC95
GrN-20631	CF I-1	0	-1	-0.5	2760	40	-28.21		-969	-841		-1002	-826		-1050	-805		-906	49	-903			KM/MOC95
GrN-20032	BHY (6)	Plough fill			2390	40	-29.38		-516	-401		-747	-389		-760	-380		-504	95	-477			KM/MOC95
*********
GLU IV - all dates (April 2000)			Blue indicated dates rec'd in 2000
GrN-24963	GLU IV-22	166	164	165	1570	50			427	539		395	595		335	641		487	54	487			2000 date
GrN-21638	GLU IV 14	170	167	168.5	1820	50	-28.27		128	251		78	332		29	389		200	66	196			KM/MOC95			Not used in age/depth model; too old, compared with adjacent dates
GrN-24962	GLU IV-21	172	171	171.5	1680	40			266	411		245	506		232	537		357	54	363			Obtained 2000
GrN-24961	GLU IV-20	175	174	174.5	1750	40			239	340		144	392		130	409		288	55	291			Obtained 2000
GrN-24960	GLU IV-19	178	177	177.5	1730	40			252	379		220	405		135	420		308	51	309			Obtained 2000
GrN-24959	GLU IV-18	182	181	181.5	1850	60			86	235		27	330		-39	385		170	73	168			Obtained 2000
GrN-21637	GLU IV 13	188	185	186.5	1940	50	-29.14		6	125		-48	212		-156	241		62	60	61			KM/MOC95
GrN-24958	GLU IV-17	190	189	189.5	2000	70			-92	76		-201	138		-356	242		-16	89	-11			Obtained 2000
GrN-24957	GLU IV-16	228	226	227	2530	50			-793	-553		-805	-490		-811	-411		-656	91	-650	T: 228 to 232		Obtained 2000
GrN-24956	GLU IV-15	234	232	233	2420	60			-736	-405		-757	-399		-796	-365		-564	111	-540			Obtained 2000
GrN-21636	GLU IV 12	258	255	256.5	2890	50	-28.04		-1190	-1001		-1217	-929		-1289	-852		-1078	76	-1075			KM/MOC95
GrN-21121	GLU IV 5	293	289	291	3310	60	-27.84		-1658	-1512		-1741	-1451		-1876	-1412		-1593	71	-1590			KM/MOC95
GrN-21635	GLU IV 11	322	319	320.5	3550	50	-27.43		-1956	-1776		-2024	-1751		-2132	-1690		-1884	76	-1891			KM/MOC95
GrN-21120	GLU IV 4	355	351	353	3890	60	-27		-2465	-2296		-2564	-2155		-2584	-2057		-2364	88	-2369			KM/MOC95
GrN-21634	GLU IV 10	390	387	388.5	4070	60	-27.83		-2850	-2492		-2866	-2473		-2890	-2349		-2650	112	-2631			KM/MOC95
GrN-21119	GLU IV 3	406	402	404	4110	60	-28.01		-2859	-2579		-2878	-2496		-2892	-2472		-2699	103	-2693			KM/MOC95
GrN-21633	GLU IV 9	444	440	442	4470	60	-28.05		-3334	-3030		-3355	-2934		-3486	-2907		-3171	114	-3176			KM/MOC95
GrN-21118	GLU IV 2	452	448	450	4550	60	-27.59		-3368	-3107		-3499	-3030		-3622	-2931		-3248	114	-3231			KM/MOC95
GrN-21632	GLU IV 8	462	459	460.5	4500	60	-26.9		-3340	-3101		-3369	-2945		-3498	-2916		-3199	105	-3203			KM/MOC95
GrN-21117	GLU IV 1	490	486	488	4840	60	-28.15		-3696	-3532		-3766	-3384		-3800	-3373		-3613	77	-3631			KM/MOC95
GrN-21631	GLU IV 7	497	494	495.5	5170	60	-27.49		-4046	-3819		-4226	-3797		-4240	-3764		-3976	93	-3980			KM/MOC95
GrN-21630	GLU IV 6	518	515	516.5	5100	80	-28.53		-3972	-3797		-4053	-3696		-4231	-3651		-3886	95	-3880			KM/MOC95			Not used in age/depth model; age reversal; considered too young
****
Garrynagran (GRN I)																					T: 9-4 cm
GrN-24966	GRN I-9	10	8	9	1170	30			777	893		771	965		715	985		853	53	850	6–5 cm had highest concentration; 58 shards		Obtained 2000			Not used in age/depth model; considered too young
GrN-22184	GRN I-6	36	34	35	3730	40			-2199	-2042		-2281	-1985		-2300	-1949		-2128	66	-2130			Jennings 1997
GrN-22183	GRN I-5	52	50	51	4090	50			-2853	-2505		-2871	-2490		-2879	-2474		-2677	105	-2660			Jennings 1997
GrN-21114	GRN-W1	60	55	57.5	4110	20			-2848	-2589		-2858	-2579		-2870	-2572		-2703	86	-2671			Jennings 1997			pine stump (small): outermost 80 narrow rings dated; ca. 120 rings in all
GrN-21816	GRN I-3	70	68	69	4350	50			-3019	-2907		-3262	-2886		-3335	-2872		-2990	76	-2979			Jennings 1997
GrN-21815	GRN I-2	94	92	93	4510	60			-3346	-3105		-3486	-3017		-3501	-2917		-3208	104	-3208			Jennings 1997
GrN-21814	GRN I-1	120	118	119	5010	60			-3936	-3709		-3953	-3666		-3972	-3644		-3814	80	-3804			Jennings 1997
GrN-21115	GRN-W2	150	140	145	5455	15			-4340	-4271		-4346	-4263		-4351	-4259		-4308	28	-4324			Jennings 1997			pine stump (large) ca. 40 outer rings dated; ca. 100 rings in all
GrN-24965	GRN 1-8	158	155	156.5	5810	50			-4724	-4593		-4785	-4544		-4841	-4488		-4660	64	-4661			Obtained 2000
GrN-22182	GRN I-4	180	178	179	6480	50			-5485	-5376		-5529	-5331		-5611	-5311		-5435	50	-5433			Jennings 1997
GrN-24964	GRN I-7	228	226	227	7820	60			-6754	-6573		-7001	-6481		-7031	-6470		-6674	102	-6657			Obtained 2000
Note: present-day peat surface regarded as 0 cm depth. But at least 1 m of peat had been removed (some years prior to sampling) by peat cutters
Mineral ground at 265 cm (wrt to surface at time of sampling)
GRN I pollen profile goes from 190-20 cm

## Sheet: Tab S1b_14C pine_timbers_cal
Table S1b	14C dates, pine timbers, calibrated results
2019-06-10	Oxcal v 4.3.2; IntCal13; 06/2019 (3 UBA dates substituted for UCD dates - from Belderrig); W = pine from top of wall; unmodelled cal BC (hence negative) dates
						% prob.: 68.2			% prob.: 95.4			% prob.: 99.7
Sample name/location	Geographical co-ordinates (WGS84)	Peat (cm)	Altitude (m asl)	14C date (BP)	+/-	from	to		from	to		from	to		mu	sigma	median	d13C(‰)	Source	Additional information/remarks	Further remarks/information
Céide Fields
UCD-C45: Behy, 1 m from wall	54.30472, -9.46202	0		4450	60	-3330	-3020		-3341	-2929		-3366	-2904		-3147	120	-3144		Caulfield et al. 1999	MO'C: nearest wall is to the E; I'm assuming it is to S of CT
UCD-C51: Behy, near tomb	54.30508, -9.46261	5		4500	60	-3340	-3101		-3369	-2945		-3498	-2916		-3199	105	-3203		Caulfield et al. 1999	“was found laying horizontally in the bog and was taken from 5 cm above the mineral soil” 4500 60; nr C45 so co-ords similar (Caulfield has co-ords = C45)
UCD-C57: Behy, 65 m west of tomb	54.30479, -9.4634	0		4420	50	-3265	-2925		-3332	-2915		-3348	-2904		-3095	120	-3067		Caulfield et al. 1999	65 m west of the tomb and lying on the mineral soil; outer remnant of a very large trunk of a fallen pine
UCD-C42: Glenulra	54.30172, -9.4446	90		4530	60	-3359	-3106		-3494	-3025		-3516	-2924		-3225	106	-3217		Caulfield et al. 1999
UCD-C44: Glenulra	54.30091, -9.44396	0		5370	70	-4328	-4073		-4346	-4006		-4445	-3971		-4196	91	-4200		Caulfield et al. 1999	stump at the base of peat and is earlier than the clearly defined pine phase.
UCD-C21: Ballyknock	54.28864, -9.41907	10		4490	60	-3338	-3097		-3365	-2943		-3496	-2911		-3190	107	-3196		Caulfield et al. 1999
UCD-C23: Ballyknock	54.28408, -9.42506	75		4540	60	-3364	-3106		-3497	-3027		-3519	-2928		-3236	109	-3223		Caulfield et al. 1999
UCD-C28: Ballyknock	54.28393, -9.42639	20		4230	60	-2911	-2697		-3008	-2620		-3086	-2572		-2801	90	-2795		Caulfield et al. 1999
UCD-C29: Ballyknock	54.28389, -9.42759	30		4510	50	-3345	-3106		-3364	-3029		-3495	-2927		-3212	92	-3211		Caulfield et al. 1999
UCD-C34: Ballyknock	54.28417, -9.42412	35		3950	60	-2567	-2347		-2620	-2213		-2853	-2197		-2444	96	-2449		Caulfield et al. 1999
UCD-C37: Ballyknock	54.28501, -9.42202	30		4500	50	-3338	-3103		-3362	-3027		-3487	-2927		-3205	94	-3209		Caulfield et al. 1999
UCD-C22: Aghoo	54.25918, -9.40271	25		4210	60	-2899	-2681		-2917	-2620		-3021	-2500		-2779	86	-2780		Caulfield et al. 1999
UCD-C27: Aghoo	54.26468, -9.39369	25		4170	50	-2877	-2679		-2891	-2601		-2909	-2500		-2753	80	-2756		Caulfield et al. 1999
UCD-C30: Aghoo	54.26101, -9.39731	20		4190	50	-2887	-2681		-2899	-2626		-2919	-2572		-2767	77	-2770		Caulfield et al. 1999
UCD-C33: Aghoo	54.26078, -9.39793	30		4100	60	-2859	-2574		-2876	-2491		-2891	-2469		-2688	106	-2679		Caulfield et al. 1999
Annagh More/Annagh Beg (3 km east of Aghoo)
UCD-C26: Annagh More; W	54.24981, -9.35789	on wall		4350	60	-3081	-2901		-3322	-2878		-3344	-2759		-3006	98	-2987		Caulfield et al. 1999
UCD-C50: Annagh More	54.24981, -9.35789	0		4440	60	-3328	-2945		-3339	-2923		-3362	-2903		-3133	123	-3117		Caulfield et al. 1999
UCD-C24: Annagh Beg	54.2319, -9.35271	180		4440	60	-3328	-2945		-3339	-2923		-3362	-2903		-3133	123	-3117		Caulfield et al. 1999
UCD-C38: Annagh Beg	54.23191, -9.35117	140		3820	60	-2401	-2146		-2466	-2060		-2559	-2022		-2278	100	-2275		Caulfield et al. 1999
Belderrig
UBA-16468: Belderg Beg	54.3048, -9.56253	0		4437	25	-2914	-2636		-3088	-2496		-3335	-2467		-2794	137	-2787		Caulfield et al. 1999	nr C31: outer rings with its roots in the mineral soil were dated to 4510 50 BP (Caulfield et al. 1998) [SI-1470]
UCD-C04: Belderg More	54.30961, -9.5412	30		4480	60	-3338	-3091		-3361	-2938		-3491	-2911		-3181	110	-3187		Caulfield et al. 1999	Belderg More; 2 m from a wall on 30 cm of peat
UCD-C11: Belderg More	54.30662, -9.52437	50		4010	60	-2621	-2466		-2855	-2346		-2874	-2289		-2553	106	-2541		Caulfield et al. 1999	Belderg More; 1 km further to the east, 55 m from another wall junction on 50 cm of peat
UCD-C14: Belderg More	54.30722, -9.51652	25		4310	70	-3080	-2878		-3317	-2679		-3340	-2625		-2957	115	-2951		Caulfield et al. 1999	Belderg More; further again to the east, on 25 cm of peat
UCD-C18: Belderg More	54.3105, -9.54118	0		4150	60	-2872	-2637		-2888	-2577		-2908	-2488		-2734	92	-2736		Caulfield et al. 1999	Belderg More; 30 m east of a wall junction in mineral soil
UBA-16470: Belderg More; W	54.3103, -9.54116	on a wall		4531	30	-3498	-3117		-3517	-3097		-3632	-3018		-3301	129	-3316		Caulfield et al. 1999	Belderg More; 9 m south of the above junction and on top of the wall; already dated by UCD-C49
UCD-C07: Belderg Beg	54.30021, -9.5731	70		3330	50	-1681	-1533		-1742	-1502		-1871	-1437		-1612	64	-1614		Caulfield et al. 1999	Belderg Beg; 70 cm of peat nr C58
UCD-C31: Belderg Beg	54.30479, -9.56263	0		4510	50	-3345	-3106		-3364	-3029		-3495	-2927		-3212	92	-3211		Caulfield et al. 1999	Belderg Beg; 5 m from a wall at the Belderg site; indistinguishable from C49
UCD-C58: Belderg Beg	54.30019, -9.57464	75		3960	60	-2571	-2348		-2828	-2235		-2859	-2199		-2462	98	-2469		Caulfield et al. 1999	Belderg Beg; on 75 cm of peat, some 800 m southwest of C31
UCD-C60: Belderg Beg	54.30019, -9.55938	unknown		3930	50	-2488	-2340		-2571	-2235		-2621	-2201		-2414	79	-2414		Caulfield et al. 1999	Belderg Beg; trunk now in VC
UBA-16469: Geevraun	54.30676, -9.56448	45		4026	24	-2899	-2681		-2917	-2620		-3021	-2500		-2779	86	-2780		Caulfield et al. 1999	300 m west of the Belderg Beg excavation (NW probably?) [previously dated UCD-C47; see below]
Erris region
UCD-C01: Inver	54.2386, -9.86502	75		4240	60	-2917	-2698		-3011	-2629		-3090	-2575		-2815	93	-2806		Caulfield et al. 1999
UCD-C02: Aghoos	54.25143, -9.74873	65		4340	60	-3023	-2897		-3321	-2874		-3341	-2700		-2994	93	-2979		Caulfield et al. 1999
UCD-C12: Aghoos	54.25465, -9.75798	75		3950	60	-2567	-2347		-2620	-2213		-2853	-2197		-2444	96	-2449		Caulfield et al. 1999
UCD-C05: Carnhill	54.2554, -9.80601	135		4250	60	-2921	-2700		-3017	-2636		-3091	-2579		-2832	96	-2856		Caulfield et al. 1999
UCD-C13: Muings	54.21242, -9.86873	200		3990	60	-2619	-2409		-2837	-2299		-2869	-2208		-2517	103	-2518		Caulfield et al. 1999
UCD-C16: Bunalty	54.24245, -9.64446	65		4490	60	-3338	-3097		-3365	-2943		-3496	-2911		-3190	107	-3196		Caulfield et al. 1999
UCD-C19: Gortmelia	54.23898, -9.83617	10		4530	60	-3359	-3106		-3494	-3025		-3516	-2924		-3225	106	-3217		Caulfield et al. 1999
UCD-C20: Carrowmore	54.21775, -9.81377	65		4230	60	-2911	-2697		-3008	-2620		-3086	-2572		-2801	90	-2795		Caulfield et al. 1999
UCD-C25: Glencullin	54.18134, -9.72332	15		4460	60	-3331	-3026		-3349	-2931		-3370	-2904		-3159	117	-3164		Caulfield et al. 1999
UCD-C35: Graghil	54.27282, -9.8561	40		4440	50	-3327	-3013		-3336	-2925		-3354	-2911		-3133	119	-3111		Caulfield et al. 1999
UCD-C36: Gortbrack North	54.25542, -9.81849	125		3090	50	-1415	-1289		-1489	-1220		-1505	-1128		-1344	62	-1345		Caulfield et al. 1999
UCD-C43: Muingerroon South	54.22208, -9.76594	30		4080	60	-2853	-2498		-2871	-2476		-2895	-2454		-2664	111	-2649		Caulfield et al. 1999	cf. Lu-774: Glenamoy
UCD-C41: Muingerroon South	54.22245, -9.76546	0		6720	90	-5716	-5560		-5775	-5483		-5902	-5384		-5635	75	-5636		Caulfield et al. 1999	cf. Lu-775: Glenamoy
UCD-C52: Tullaghanbaun	54.06791, -9.91432			4070	60	-2850	-2492		-2866	-2473		-2890	-2349		-2650	112	-2631		Caulfield et al. 1999
UCD-C48: Tullaghanbaun	54.06791, -9.91432	80		7530	100	-6466	-6256		-6599	-6125		-6649	-6073		-6379	100	-6386		Caulfield et al. 1999
Lu-774: Glenamoy	54.22186, -9.76723	20	30	4340	65	-3081	-2894		-3328	-2872		-3349	-2693		-3000	104	-2983		Håkannson 1974	the double layer of pine stumps has been replicated in the present study with dates of 6720±90 BP (C41) and 4080±60 BP (C43) for the same general location (Caulfield et al. 1998)
Lu-775: Glenamoy	54.22199, -9.76718	0	30	7110	75	-6057	-5906		-6205	-5810		-6220	-5749		-5981	78	-5986		Håkannson 1974	See above	Notes from Håkannson 1974: Lu-774:
Garrynagran																					No. rings	Peat thickness beneath (cm)	Material dated	14C in life history	Location details
GRN W1 GrN-21114	54.17433, -9.38826	205	68	4110	20	-2848	-2589		-2858	-2579		-2870	-2572		-2703	86	-2671		Jennings 1997	outermost 80 narrow rings dated; ca. 120 rings in all	120	205	40-120	E	Depth in GRN I: 55-60 cm
GRN W2 GrN-21115	54.17433, -9.38826	115	67.5	5455	15	-4340	-4271		-4346	-4263		-4351	-4259		-4308	28	-4324		Jennings 1997	ca. 40 outer rings dated; ca. 100 rings in all	100	115	60-100	E	Depth in GRN I: 140-150 cm
G28M GrN-22192	54.17188, -9.37851	230	84	4405	25	-3089	-2936		-3097	-2922		-3323	-2910		-3022	65	-3021		Jennings 1997	Large pine stump G28; slice cut c. 100 cm above root. Wood from rings 90-120 on radius G28c	218	230	97-127	M	N of trackway; row 1, NE-most timber
G30M GrN-22186	54.17153, -9.37834	n/a	84	4350	25	-3011	-2911		-3023	-2904		-3090	-2893		-2965	39	-2964		Jennings 1997	Pine stump G30; small; slice cut 80 cm above root buttress. Wood from rings 60-110 on radius G30b	183	in situ; peat depth not available	63-113	M	N of trackway; row 1, NE-most timber
G34M GrN-22188	54.17224, -9.38289	n/a	84	4090	25	-2835	-2578		-2856	-2503		-2866	-2492		-2668	91	-2637		Jennings 1997	Pine stump G34; large; slice cut 15 cm above r-b. Wood from rings 125-151 on radius G34c	218	in situ; peat depth not available	144-170	E	N of trackway; row 2, S-most timber
G41M GrN-22187	54.17036, -9.38131	n/a	84	5565	25	-4446	-4362		-4452	-4354		-4465	-4339		-4403	30	-4402		Jennings 1997	Pine stump G41; small; slice cut 15 cm above root. Wood from rings 32-70 on radius G41b	183	not in situ	54-92	M	WP1 (pile of uprooted timbers; not in situ!)
G42M GrN-22190	54.17079, -9.38223	n/a	84	6315	25	-5322	-5230		-5345	-5221		-5370	-5216		-5286	35	-5296		Jennings 1997	Pine stump G42; large; slice cut 110 cm above r-b. Wood from rings 58-90 on radius G42c	250	not in situ	66-98	M	S of trackway, +/- isolated trunk
G43M GrN-22185	54.16993, -9.38208	n/a	84	4720	25	-3627	-3382		-3632	-3377		-3636	-3372		-3503	88	-3513		Jennings 1997	Pine trunk G43; slice taken 80 cm from root buttress. Wood from rings 30-77 on radius G43a	158	not in situ	36-83	M	S of trackway; SW of WP1
G44M GrN-22189	54.16993, -9.38208	n/a	84	4390	20	-3079	-2930		-3090	-2920		-3096	-2913		-2994	48	-2987		Jennings 1997	Pine stump G44; slice cut 15 cm above root. Wood from rings 60-93 on radius G44c	211	not in situ	60-93	M	S of trackway; SW of WP1
G50M GrN-22191	54.1703, -9.37711	n/a	84	5620	25	-4491	-4375		-4501	-4366		-4537	-4358		-4440	39	-4450		Jennings 1997	Pine trunk G50; small; 250 cm long. Wood from rings 53-85 on radius G50a	113	not in situ	56-88	M	E of WP 1; at field entrance
Carrowkennedy
FRK W6 GrN-21887	53.71103, -9.55517	n/a	81	6250	20	-5293	-5216		-5303	-5211		-5312	-5076		-5253	35	-5258		Jennings 1997	Ring widths measured (from corings of trunk at breast height); at least 122 years; probably not >150 y	122+	NA	105-120	E	Bog north of Carrowkennedy, Co. Mayo. In Visitor Centre, CNP (back stairs; long trunk; ca. 6 m)
FRK W7 GrN-21888	53.71111, -9.55532	n/a	81	7780	20	-6637	-6603		-6651	-6535		-6674	-6506		-6616	22	-6618		Jennings 1997	Ring widths not measured	NA	NA	Outer 45 rings	E	Bog north of Carrowkennedy, Co. Mayo. Now in Visitor Centre, CNP (smaller of two trunks; in the main display)
Inisbofin (Cloonamore)
CL-1 GrN-20710	53.62448, -10.20474	290	33	4150	25	-2866	-2672		-2875	-2631		-2881	-2582		-2751	69	-2745		O'Connell and Ní Ghráinne 1994	Twelve rings, each c. 5 mm wide, from near centre of stump. 30+ wide rings followed by 1+ cm with 10+ narrow rings were noted	c. 60	290	8-20	S	Beside pollen profile (short) CLM II in Middlequarter Td. (S of Bunnamullen Bay), Inisbofin
CL-2 GrN-20711	53.62444, -10.20457	290	33	4140	25	-2862	-2636		-2872	-2625		-2878	-2581		-2742	74	-2735		O'Connell and Ní Ghráinne 1994	Approx. 13 rings taken from near the centre of a large stump; at least 40 rings to outside.	55+	290	10-25	S	Beside pollen profile (short) CLM II in Middlequarter Td. (S of Bunnamullen Bay), Inisbofin
L. Mask, Co. Mayo (Shanvallycahill [Sean Bhaile Chathail])
MY-001 GrN-33045	53.59913, -9.437	40	27	4305	20	-2916	-2897		-3003	-2887		-3013	-2882		-2910	19	-2907	-26.22	M O'Connell, unpublished	d: 23 cm; ht: 80 cm; age: 250 y; stump & trunk that stood upright (proud of peat)	250	40	200-240	E	L. Mask, Co. Mayo (Shanvallycahill [Sean Bhaile Chathail])
MY-002 GrN-33046	53.59951, -9.43753	>100	26	4380	20	-3017	-2930		-3085	-2917		-3092	-2912		-2983	42	-2978	-25.54	M O'Connell, unpublished	d: 27 cm; ht: 70+ cm; age: 250 y	250	>100	25-40	S	L. Mask, Co. Mayo (Shanvallycahill [Sean Bhaile Chathail])
MY-003 GrN-33047	53.59933, -9.43963	80	25	4335	25	-3010	-2902		-3016	-2899		-3085	-2888		-2952	39	-2942	-25.81	M O'Connell, unpublished	d: 56 cm; ht: ht: 70+ cm; age: 150+ y	150+	80	130-150	E	L. Mask, Co. Mayo (Shanvallycahill [Sean Bhaile Chathail])
MY-004 GrN-33048	53.60128, -9.43375	>100	25	4220	25	-2894	-2765		-2901	-2701		-2908	-2677		-2825	59	-2808	-25.42	M O'Connell, unpublished	d: 25 cm; ht: 70 cm; age: 200+ y	200+	>100	120-140	E	L. Mask, Co. Mayo (Shanvallycahill [Sean Bhaile Chathail])
*** Below UCD 14C dates - these timbers were subsequently redated - UBA dates - the UBA dates are given above
UCD 14C dates; samples redated by UBA (see above)
SI-1470: Belderg Beg	54.3105, -9.54118	0		4220	95	-2914	-2636		-3088	-2496		-3335	-2467		-2794	137	-2787		Caulfield et al. 1999
UCD-C49: Belderg More; W	54.3103, -9.54116	on a wall		4580	60	-3498	-3117		-3517	-3097		-3632	-3018		-3301	129	-3316		Caulfield et al. 1999
UCD-C47: Geevraun	54.30676, -9.56448	45		4210	60	-2899	-2681		-2917	-2620		-3021	-2500		-2779	86	-2780		Caulfield et al. 1999
Peat samples: obtained in connection with UCD pine timber project
C46: Geevraun (peat)	Geevraun (peat)	5		5710	90														Caulfield et al. 1999	peat beneath C47
C54: Tullaghanbaun (peat)	Tullaghanbaun (peat)	beneath C48		8660	130														Caulfield et al. 1999	C54 is peat beneath C48; spatial relationship to C52 uncertain but presumably C52 is from nearby
n/a = not available
VC = Visitor Centre

## Sheet: Tab S1a_Pollen profiles_geog
Table S1a	Details, including locations, of pollen profiles
Profile no. etc	Co-ordinates (GSM84)	Alt. (m)	14C dates (no.*)	Pollen profile temporal span	Source	Location, comments etc (distances approx.)
Céide Fields
Behy I	54.30507, -9.46241	143	None	ca. 3150 BC–AD 1950	Moore (1979)	Near CT; exact location unknown
Behy II	54.30643, -9.4918	83	None	ca. 4200–AD 1900	Moore (1979)	This and Behy I shown on map in Bourke (1972, Fig. 4)
BHY III	54.30492, -9.46441	136	7	≥2700–250 BC	KM & MO’C (1995)	BHY III lies 138 m west of the Behy court tomb (not 65 m as indicated in KM & MO’C 1995)
BHY IV	54.30504, -9.46242	143	3	≥2400 BC–AD 20	KM & MO’C (1995)	24 m due N of CT chamber
BHY V	54.30482, -9.46204	147	5	≥2600–210 BC	KM & MO’C (1995)	25 m EEN of the CT chamber and 2 m E of a curving wall that runs NE from the CT
BHY VI	54.30624, -9.46849	108	4	≥2600–AD 120	KM & MO’C (1995)	425 m NW of CT, ca. 100 m east of deep ravine
CF 1b, CF III	54.30709, -9.45841	128	3	ca. 1000 BC–AD 800	KM & MO’C (1995)	30 m SW of proximal corner of the pyramidal base of VC.
PLM	54.30715, -9.45757	125	1	ca. 470 BC	KM & MO’C (1995)	Plough marks; from excavation conducted prior to construction of VC (Byrne et al. 2009)
GLU IV	54.30079, -9.44234	88	22	>6800 BC–AD700	KM & MO’C (1995)	1.35 km SE of CT
Belderrig
Belderg (BDG1)	54.30478, -9.5623	42	[2]	ca. 3200–1500 BC	Bourke (1972)	Monolith from side of a stone wall (W3 in Verril & Tipping 2010), W of BA house in main part of archaeological site
BEL	54.3035, -9.55919	27	2	mid-Holocene	Verril & Tipping (2010)	Short profile from basin, 220 m S of BA house & SE of road; published in The Holocene
West of Belderrig
Patchico	54.30319, -9.57404	78	2	mid to late Holocene	Hawthorne & Davis (2013)	950 m west of BA house (details in IQUA FG, N. Mayo 2013)
Cregganmore	54.27394, -9.59058	77	3, 10	Holocene	Holmes et al. (2013)	4 km SW of Belderrig; 3 cores in all: Cregganmore 1; 677 cm long; additional profiles from this lake: Cregganmore 2 623 cm long; also Cregganmore (McKeever 1984)
Garrynagran
GRN I	54.17433, -9.38825	68	10	5700–1800 BC	Jennings (1997); MO’C & KM (2001)	In Ballynagor Td. which adjoins Garrynagran Td. GRN I is 16 km to south of Visitor Centre, Céide Fields
CT = Behy Court Tomb
