# Supplementary material for: Long-term human impact and environmental change in mid-western Ireland, with particular reference to Céide Fields – an overview
Source: Copernicus journal article supplement (doi:10.5194/egqsj-69-1-2020), 2020-02-11
Supplement: Supplementary file 1 [file egqsj-69-1-2020-supplement.zip › Table S2_pollen summaries_S1a GLU IV_S2b GRN I.docx]

**Table S2****.** Supplementary material: tables providing an overview of long pollen profiles from north Mayo, i.e. Céide Fields (GLU IV) and Garrynagran (GRN I).

Table S2a: Overview of pollen profile GLU IV (Glenulra)

Table S2b: Overview of pollen profile GRN I (Garrynagran)

**Table S2a.** Overview of vegetation dynamics and land-use change at, and in the vicinity of, Glenulra basin, from pre-Neolithic (Boreal) to the medieval period based on pollen profile GLU IV.

| PAZs | Depth  (cm) | Age  (cal. years) | Duration  (years) | Pollen features | Vegetation and basin conditions  (local; mainly in peat basis) | Vegetation and land use (regional) |
| --- | --- | --- | --- | --- | --- | --- |
| 11-top | 150–0 | AD 700–1990 | 1290 | No data available | Peat accumulation ca. 1.2 mm yr-1, i.e. double what it had been | Present-day treeless and extensive blanket bog develops |
| 11 | 162–150 | AD 510–700 | 190 | AP decline; NAP increase | Cyperaceae and *Narthecium* increase suggest increased wetness | Increased farming impacts on woody vegetation which probably leads to total clearance |
| 10 | 186–162 | AD 110–510 | 400 | Increased AP; substantial decline in NAP | Heathers increase and sedges, etc. decline suggesting much drier conditions | Woodland regeneration (mainly hazel and birch) in response to decline in farming, i.e. LIAL7 |
| 9b | 248–186 | 850 BC–AD 110 | 960 | Similar to 9a. Near top, decrease in *Alnus* and *Corylus* increases | Considerable shift towards more heathers and less *Rhynchospora* and *Narthecium*, i.e. inc. wetness. Much charcoal (local and regional firing) | Farming activity similar to that in 9a. Increased activity towards the top (cf. *P. lanceolata* and Poaceae) |
| 9a | 292–248 | 1650–850 BC | 800 | As in zone 8, but inc. in *Alnus* and very low *Pinus* values | Wet conditions persist. *Myrica* assumes importance for first time. Alder probably assumes importance locally and also regionally. | Substantial human impact. Pine very rare; may not be locally present. |
| 8 | 356–292 | 2330–1650 BC | 680 | Substantially higher NAP and lower AP | *Narthecium* important; suggests wet conditions. Beginning of sustained inc. in firing (local and regional) probably connected with human activity | Substantial woodland clearance that includes birch and hazel. Sustained increase in pastoral farming |
| 7 | 400–356 | 2720–2330 BC | 390 | Small and distinct shift towards lower AP and higher NAP | ‘Pine flush’ ends; plays a greater role. Ling locally present but mire now dominated by sedges, incl. *Rhynchospora*, i.e. a wet indicator | Low-level pastoral farming. Impact on woods small; oak becomes relatively more important; minor pine population persists |
| 6b | 412–400 | 2820–2720 BC | 100 | *Pinus* increase; AP high (now incl. *Fraxinus*) and NAP low | ‘Pine flush’; heathers begin to decline; *Sphagnum* common; *Amphitrema flavum* curve begins; inc. in local wetness | ‘Pine flush’, i.e. pine common on peaty surfaces locally and regionally; human impact low |
| 6a | 448–412 | 3160–2820 BC | 340 | Highest AP and lowest NAP in profile | *Calluna* dominant; *Empetrum* important; dry habitat; local fires | Hazel, oak, elm, birch, pine (in that order of importance); little/no farming esp. towards end |
| 5c | 472–448 | 3460–3160 BC | 300 | AP (mainly *Corylus* and *Alnus*) increase | *Sphagnum* remains important. Towards end, drier (cf. *Calluna* and *Empetrum*) | Partial woodland regeneration (mainly hazel); farming impact persists |
| 5b | 492–472 | 3790–3460 BC | 330 | Major NAP expansion; AP declines AP5 | *Sphagnum* is locally dominant; wet conditions | Landnam, i.e. major (probably total) woodland clearance for pastoral farming6 |
| 5a | 500–492 | 3960–3790 BC | 170 | NAP increases; *Pinus* falls to low values2 | *Sphagnum* in the peat basin; inc. in wetness3 | Initial opening-up of woodland cover, probably as a result of early Neolithic farming4 |
| 1-4 | 574–500 | 6770–3960 BC1 | 2810 | NAP at first dominant; then AP (see text) | During PAZ 4, pine on basin peat (see text); local fires | Pre-farming; human impact negligable/low |

7 LIAL = Late Iron Age Lull, a period at the end of the Iron Age during which there was widespread woodland regeneration in response to reduced human impact, including farming.

6 Little charcoal so fires not important; it is assumed that woodland decline resulted from cutting down of trees and intensive grazing by domesticates (presumably mainly cattle, but also sheep and goat; see text) that prevented regeneration of woody vegetation. Cereal-type pollen common in a parallel core (Molloy and O’Connell, 1995) so there is an arable component in the early Neolithic farming economy.

5 AP falls from 86% in PAZ 4 to 29% (average values) in PAZ 5b; corresponding values for NAP (grassland): 2% and 57%, respectively; and for NAP (arable/disturbed): 0.02% and 0.06%, respectively. NAP (grassland) in PAZ 5b have high diversity.

4 Given that the Elm Decline is not a major feature, it is likely that opening-up of the woodland cover is due to farming.

3 Increased wetness indicated by local presence of *Sphagnum* and *Rhynchospora*, and decline in *Calluna*. Records of pine wood tracheids indicate that pine was still present at the base of subzone 5a.

2 Poaceae and *Pteridium* expand; *P. lanceolata* curve initiated. The mid-Holocene Elm Decline is recorded in subzone 5a but only weakly which is as expected given that elm is unimportant locally and also regionally.

1 Age for lower boundary is probably an under-estimate (see text).

**Table S2b.** Overview of vegetation and land-use dynamics at Garrynagran from the early Atlantic period to the mid-Bronze Age, based on pollen profile GRN I.

| PAZs | Depth  (cm) | Age  (cal. BC) | Dur­ation (yr) | Pollen features | Mire vegetation and habitat | Vegetation and land use (mineral soils/regional) |
| --- | --- | --- | --- | --- | --- | --- |
| 6 | 38–20 | 2270–1810 | 460 | Further small decline in AP; *Corylus* declines; *Alnus* rises | Similar to 5a. Increased firing (charcoal; also *Gelasinospora*) | Alder expands (wet areas) but overall woodland contracts as human impact increases; but impact equivalent to that in Neolithic (3b) not attained |
| 5b | 53–38 | 2620–2270 | 350 | Small decline in AP (mainly *Pinus*); *Corylus* & *Alnus* increase | Similar to 5a but pine growing on bog has ended | Pine declines; alder and hazel (esp. towards top) increase. More open woodland (cf. Poaceae & *Pteridium*) but human impact remains low |
| 5a | 59–53 | 2750–2620 | 130 | High AP, incl. *Pinus* | ‘Pine flush’ on bog (cf. stump, stomata). Beginning of continuous record for *S. imbricatum*; *Racomitrium* recorded. *Myrica* of increased importance. Wet (cf. *Assulina*) | Human impact remains very low. Elm declines; increase in hazel; small increase in ash and a minor yew curve recommences |
| 4 | 89–59 | 3240–2750 | 490 | AP increase; NAP (esp. *P. lanceolata*) low | Pine on bog. *S. imbricatum* present at base. Peak in Poaceae probably reflect bog vegetation rather than grassland (no *P. lanceolata*) | Minimal or no human impact. Pine, oak and elm-dominated woodlands; ash present, esp towards top; yew present (top of 3b, base of 4) |
| 3b | 121–89 | 3800–3240 | 560 | NAP increase; AP decline | Shift towards typical bog vegetation (*Calluna*, *Sphagnum*, Cyperaceae, *E. tetralix*). Pine, on bog, not as important as previously. *S. palustre*, *E. tetralix, Narthecium,* and *A. flavum important* towards top (wetter) | Distinct increase in pastoral farming (max. in mid zone) followed by decline. Pine mostly affected at the beginning; also elm. Oak and alder favoured. Two *Tilia* pollen in sample 114 cm. Lime not native to Ireland so these and single pollen in three other spectra attributable to long-distance transport. |
| 3a | 125–121 | 3880–3800 | 80 | Elm Decline2; little change in other AP curves | Pine present, at least at top; ling and *Sphagnum* decline. *Empetrum* common at base. Local firing (cf. charcoal and *Coenococcum*) | Of the trees, elm alone declines, presumably due to disease. Little evidence for opening-up of the closed-canopy woodland (no *P. lanceolata*) |
| 2c | 152–125 | 4530–3880 | 650 | High AP, especially *Pinus*, *Corylus* & *Ulmus* | Pine is again important on mire (cf. stomata and large stump). Also, *Sphagnum*, *Calluna* and *E. tetralix* | Woodland composition as in 2b; alder continues slow expansion |
| 2b | 160–152 | 4770–4530 | 240 | High AP; increase in *Corylus* & *Ulmus*; *Pinus* decreases | Pine not as important on mire. *Sphagnum*, also *Calluna* important, possibly as a result of decline in pine | Woodland composition shifts in favour of hazel and elm. Alder continues to slowly expand |
| 2a | 176–160 | 5280–4770 | 510 | High AP, especially *Pinus* | Pine increasingly important on mire (cf. pollen and stomata) | Pine possibly also increased in importance on mineral soil. Alder (small population) established1 |
| 1 | 190–176 | 5710–5280 | 430 | AP dominate; Poaceae average 3.1%; no *P. lanceolata* | Ling important on mire. Pine growing on peat at/near sampling site (cf. stomata). Poaceae pollen probably derives from mire (no *P. lanceolata*) | Pine/hazel woodlands with small quantities of oak and elm. Alder probably not yet present |

2 This is the mid-Holocene Elm Decline. It begins at 3880 BC, i.e. at the generally accepted date for this feature (Parker et al., 2002). *Ulmus* decreases from 10.5% to 4% across PAZ 3/2 boundary.

1 There is no clearly defined Boreal/Atlantic transition (as defined by expansion of *Alnus*). It is probably best placed at 1/2a but 2a/2b boundary is also a possibility.
